# Calcium-mediated cell death during myocardial reperfusion

David Garcia-Dorado<sup>1\*</sup>, Marisol Ruiz-Meana<sup>1</sup>, Javier Inserte<sup>1</sup>,  
Antonio Rodriguez-Sinovas<sup>1</sup>, and Hans Michael Piper<sup>2</sup>

<sup>1</sup>Laboratory of Experimental Cardiology, Vall d'Hebron University Hospital and Research Institute, Universitat Autònoma de Barcelona, Pg. Vall d'Hebron 119-129, 08035 Barcelona, Spain; and <sup>2</sup>Heinrich Heine University, Düsseldorf, Germany

Received 4 January 2012; revised 16 February 2012; accepted 5 March 2012

This article was guest-edited by Klaus-Dieter Schlüter, Justus Liebig University of Giessen, Giessen, Germany.

## Abstract

Reperfusion may induce additional cell death in patients with acute myocardial infarction receiving primary angioplasty or thrombolysis. Altered intracellular  $\text{Ca}^{2+}$  handling was initially considered an essential mechanism of reperfusion-induced cardiomyocyte death. However, more recent studies have demonstrated the importance of  $\text{Ca}^{2+}$ -independent mechanisms that converge on mitochondrial permeability transition (MPT) and are shared by cardiomyocytes and other cell types. This article analyses the importance of  $\text{Ca}^{2+}$ -dependent cell death in light of these new observations. Altered  $\text{Ca}^{2+}$  handling includes increased cytosolic  $\text{Ca}^{2+}$  levels, leading to activation of calpain-mediated proteolysis and sarcoplasmic reticulum-driven oscillations; this can induce hypercontracture, but also MPT due to the privileged  $\text{Ca}^{2+}$  transfer between sarcoplasmic reticulum and mitochondria through cytosolic  $\text{Ca}^{2+}$  microdomains. In the opposite direction, permeability transition can worsen altered  $\text{Ca}^{2+}$  handling and favour hypercontracture.  $\text{Ca}^{2+}$  appears to play an important role in cell death during the initial minutes of reperfusion, particularly after brief periods of ischaemia. Developing effective and safe treatments to prevent  $\text{Ca}^{2+}$ -mediated cardiomyocyte death in patients with transient ischaemia, by targeting  $\text{Ca}^{2+}$  influx, intracellular  $\text{Ca}^{2+}$  handling, or  $\text{Ca}^{2+}$ -induced cell death effectors, is an unmet challenge with important therapeutic implications and large potential clinical impact.

## Keywords

Myocardial infarction • Reperfusion injury • Calpain • Mitochondria

This article is part of the Spotlight Issue on: Reducing the Impact of Myocardial Ischaemia/Reperfusion Injury

## 1. Background: from $\text{Ca}^{2+}$ paradox to oxygen paradox

Myocardial reperfusion injury, defined as a kind of cell death occurring secondary to transient ischaemia that is preventable by interventions applied at the time of reperfusion,<sup>1–6</sup> is now recognized as an important element of the pathophysiology of myocardial ischaemia–reperfusion. However, its cellular and molecular mechanisms are far from being completely elucidated.<sup>3</sup> Alterations in cellular  $\text{Ca}^{2+}$  homeostasis have been considered part of these mechanisms during the past few decades, and several hypotheses have been proposed to explain their causative role in cell death.

Electron microscopy studies performed at different times after coronary reperfusion demonstrated rapid and massive  $\text{Ca}^{2+}$  deposition in the mitochondrial matrix of reperfused myocardium.<sup>7,8</sup> The

initial hypotheses on the mechanism of reperfusion injury conceded a capital importance to cytosolic  $\text{Ca}^{2+}$  overload. In fact, the so-called  $\text{Ca}^{2+}$  paradox (hypercontracture and death of cardiomyocytes occurring upon restoration of  $\text{Ca}^{2+}$  after a  $\text{Ca}^{2+}$ -free perfusion period) was meant to be a first cellular model of reperfusion injury.<sup>9</sup> Hypercontracture was recognized as the cause of the characteristic histological appearance of reperfused infarcts known as contraction band necrosis.<sup>10</sup> Hypercontracture could also be observed in isolated perfused hearts submitted to reoxygenation after transient hypoxia, a phenomenon that was named 'oxygen paradox'.<sup>11</sup> Hypercontracture was proposed to be a triggering cause of cell death in isolated cardiomyocytes<sup>12</sup> and intact tissue,<sup>13</sup> as contractile blockers administered at the time of reperfusion were able to prevent it.

\* Corresponding author. Tel: +34 93 489 4038; fax: +34 93 489 4032, Email: dgdorado@vhebron.net

Subsequent studies identified mitochondrial permeability transition (MPT) as an important cause of reperfusion injury.<sup>14–16</sup> Although MPT was originally described as a consequence of increased mitochondrial  $\text{Ca}^{2+}$  load,<sup>17</sup> it was soon realized that other triggers were also involved. The role of  $\text{Ca}^{2+}$  as a cause of MPT lost ground in favour of reactive oxygen species (ROS), and  $\text{Ca}^{2+}$  is nowadays more often seen to play a secondary role in the pathogenesis of reperfusion injury.<sup>18–20</sup> A prominent recent review on reperfusion injury (covering not only myocardium) contains no reference to  $\text{Ca}^{2+}$  at all.<sup>6</sup> In the present article, we revisit the role of  $\text{Ca}^{2+}$  in reperfusion-induced cardiomyocyte death in the light of recently available information.

## 2. Alterations of $\text{Ca}^{2+}$ handling during ischaemia

### 2.1 $\text{Na}^+$ and $\text{Ca}^{2+}$ overload during ischaemia

Anaerobic glycolysis and  $\text{H}^+$  released by ATP breakdown produce a progressive decline in intracellular pH (pHi) during the initial minutes of ischaemia.<sup>21</sup> <sup>31</sup>P-NMR spectroscopy studies demonstrated pHi values of about 6.4 after 20 min of ischaemia in isolated rat hearts.<sup>22</sup> These initial changes are associated with a sustained rise in intracellular  $\text{Na}^+$  as determined by <sup>23</sup>Na-NMR spectroscopy.<sup>23,24</sup> This increase in intracellular  $\text{Na}^+$  has been attributed to a decrease in the energy-dependent  $\text{Na}^+$  extrusion due to the inhibition of  $\text{Na}^+/\text{K}^+$ -ATPase, and to an increased  $\text{Na}^+$  influx associated with the activation of  $\text{H}^+$  extrusion mechanisms by  $\text{Na}^+/\text{H}^+$ -exchanger (NHE) and  $\text{Na}^+/\text{HCO}_3^-$  cotransporters,<sup>25–27</sup> but also to persistent (non-inactivating)  $\text{Na}^+$  channels.<sup>28,29</sup> The relative contribution of NHE and persistent  $\text{Na}^+$  channels has not been satisfactorily resolved.<sup>28</sup> The fact that NHE activity is reduced by low extracellular pH as occurs during ischaemia,<sup>30</sup> and that the use of the first non-selective NHE inhibitors, such as amiloride, also inhibited persistent  $\text{Na}^+$  channels,<sup>28</sup> has resulted in the role of NHE in the rise in intracellular  $\text{Na}^+$  levels being questioned. In this sense, initial studies by Xiao and Allen argued that NHE1 is substantially inhibited during ischaemia and that it becomes activated during early reperfusion.<sup>31,32</sup> According to these authors, activation during this phase would be critical for reperfusion injury. However, more recent studies using a new generation of NHE inhibitors<sup>33,34</sup> and mice with null mutation in the NHE1 gene<sup>35</sup> have shown convincingly a contribution of NHE to cytosolic  $\text{Na}^+$  overload during ischaemia.

Studies in isolated cardiomyocytes labelled with fluorescence markers of  $\text{Ca}^{2+}$ <sup>36,37</sup> or isolated perfused hearts using surface fluorescence<sup>38</sup> or <sup>19</sup>F-NMR spectroscopy<sup>39</sup> have demonstrated a sustained rise in  $\text{Ca}^{2+}$  during ischaemia, which starts after the  $\text{Na}^+$  rise in close temporal association with rigor onset. When the ATP concentration reaches a critically low threshold (below 100  $\mu\text{mol/L}$ ), a force-generating crossbridge cycling is initiated, and rigor contracture develops.<sup>40</sup> Rigor contracture at this low ATP concentration is essentially  $\text{Ca}^{2+}$  independent,<sup>40,41</sup> but its onset marks the beginning of the cytosolic  $\text{Ca}^{2+}$  rise and represents a key event in the progression of ischaemic injury.<sup>42,43</sup> These low ATP concentrations would impair the activity of sarcolemmal  $\text{Na}^+/\text{K}^+$ -ATPase and sarcoplasmic reticulum  $\text{Ca}^{2+}$ -ATPase (SERCA), thus acting as a trigger for both cytosolic  $\text{Na}^+$  and  $\text{Ca}^{2+}$  overload.

The contribution of sarcolemmal NCX to cytosolic  $\text{Ca}^{2+}$  overload during ischaemia has been consistently reported in studies involving pharmacological inhibition of NCX, its genetic ablation, or reduced expression via adenovirally delivered shRNA.<sup>39,44–47</sup> The direction of NCX operation depends on the difference between transmembrane potential and the reversal potential of NCX, and is therefore determined by the intra- and extracellular concentrations of  $\text{Na}^+$  and  $\text{Ca}^{2+}$ .<sup>48</sup> Under physiological conditions, the exchanger operates mainly in its forward mode to extrude  $\text{Ca}^{2+}$  from the cytosol during diastole,<sup>49</sup> but membrane depolarization and a reduced  $\text{Na}^+$  gradient, as a consequence of the intracellular  $\text{Na}^+$  rise, determine a net  $\text{Ca}^{2+}$  influx through reverse NCX transport during ischaemia. However, the fact that prevention of  $\text{Na}^+$  overload only attenuates the rise in cytosolic  $\text{Ca}^{2+}$  during ischaemia<sup>25</sup> suggests a contribution of additional,  $\text{Na}^+$ -independent ways of  $\text{Ca}^{2+}$  entry, e.g. via the L-type  $\text{Ca}^{2+}$  channel.<sup>50</sup>

Under normal conditions, the concentration of  $\text{Ca}^{2+}$  in the mitochondrial matrix is very low and similar to that in cytosol.<sup>51</sup>  $\text{Ca}^{2+}$  enters the matrix mainly through the  $\text{Ca}^{2+}$  uniporter, dependent on the transmembrane electrochemical gradient, and is mainly extruded via the mitochondrial NCX, which is influenced by the matrix  $\text{Na}^+$  concentration<sup>52</sup> and which, in turn, depends on the  $\text{H}^+$  concentration and the activity of mitochondrial NHE.<sup>53</sup> The  $\text{H}^+$  gradient across the mitochondrial membrane, built up by respiration and dissipated by ATP synthesis, is modulated by different ion transporters and exchangers, prominently the KHE.<sup>54</sup> During myocardial ischaemia, the rise in cytosolic  $\text{Ca}^{2+}$  levels tends to increase mitochondrial  $\text{Ca}^{2+}$  influx, but dissipation of the transmembrane potential has the opposite effect. However, dissipation of the mitochondrial membrane potential is incomplete during a prolonged ischaemic period. Thus, it is generally admitted that mitochondrial  $\text{Ca}^{2+}$  influx is important during initial ischaemia and that it remains increased thereafter.<sup>55,56</sup>

### 2.2 Consequences of $\text{Ca}^{2+}$ overload during ischaemia

#### 2.2.1 Cell-to-cell uncoupling

In the ischaemic cardiomyocyte, the onset of the rise of cytosolic  $\text{Ca}^{2+}$  is closely followed by cell-to-cell electrical uncoupling.<sup>43,57</sup> It is still unclear whether the effects of  $\text{Ca}^{2+}$  are direct or mediated through intracellular messengers.  $\text{Ca}^{2+}$  probably induces connexin43 (Cx43) gap junctional closure by activation of calmodulin, which may act directly as a gating particle.<sup>57</sup> pHi is also an important regulator of Cx43 gap junction channel permeability, and acidosis probably contributes to uncoupling.<sup>57</sup> Closure of gap junctional channels by intracellular  $\text{Ca}^{2+}$  during ischaemia may protect cells from membrane depolarization and leakage of metabolites through gap junctions by disconnecting them from damaged cells.<sup>58</sup> However, reduced cell coupling may cause arrhythmias.<sup>59</sup>

#### 2.2.2 Opening of connexin hemichannels

Both extracellular and intracellular  $\text{Ca}^{2+}$  concentrations modulate unopposed connexin hemichannel gating. A decrease in extracellular  $\text{Ca}^{2+}$  has been shown to induce hemichannel opening<sup>60,61</sup> and increase Cx43 hemichannel pore diameter.<sup>62</sup> Intracellular  $\text{Ca}^{2+}$  also regulates hemichannel function in a biphasic manner: moderate increases in  $\text{Ca}^{2+}$  can induce Cx43 hemichannel opening, whereas larger increases in  $\text{Ca}^{2+}$  inhibits hemichannel activity.<sup>63</sup> The opening of Cx43 hemichannels triggered by moderate intracellular  $\text{Ca}^{2+}$  levels has been suggested to involve multiple intermediate signalling

steps<sup>64</sup> and intramolecular Cx43 loop/tail interactions.<sup>63</sup> Ischaemia induces opening of connexin hemichannels, which may contribute to cell injury and arrhythmias<sup>65</sup> through deleterious  $\text{Ca}^{2+}$  influx.<sup>66</sup> Hemichannel opening induces release of intracellular metabolites, such as ATP, inositol 1,4,5-triphosphate ( $\text{IP}_3$ ), cAMP,  $\text{NAD}^+$ , or glutamate, to the extracellular space<sup>67,68</sup> that may be involved in paracrine cardioprotective signalling.<sup>68,69</sup>

### 2.2.3 Calpain translocation to the cell membrane

Calpains represent a wide family of non-lysosomal,  $\text{Ca}^{2+}$ -dependent thiol proteases implicated in basic cellular processes including differentiation, proliferation, and cell migration and are tightly regulated by the cellular control of  $\text{Ca}^{2+}$  and its endogenous inhibitor calpastatin. Loss of  $\text{Ca}^{2+}$  homeostasis results in an unregulated overactivation of calpain.<sup>70</sup> The contribution of calpains to ischaemia/reperfusion injury has been consistently reported by several groups,<sup>71–74</sup> and the kinetics of calpain activation have been recently determined.<sup>75</sup> It has been proposed that under physiological conditions, translocation of calpains to the sarcolemma in response to transient cytosolic  $\text{Ca}^{2+}$  elevation is an obligatory step in the process of their activation.<sup>76</sup> However, translocation seems not to be essential under situations leading to a dysregulation of intracellular  $\text{Ca}^{2+}$  levels.<sup>75</sup> *In vitro* studies have shown that calpain activity is highly influenced by pH<sub>i</sub>.<sup>77</sup> Recent results from our group demonstrated that intracellular acidosis prevents calpain activation during ischaemia, despite high intracellular  $\text{Ca}^{2+}$  concentrations.<sup>75</sup>

### 2.2.4 Mitochondrial $\text{Ca}^{2+}$ overload

It is generally assumed that mitochondrial  $\text{Ca}^{2+}$  accumulation has detrimental cellular effects, facilitating mitochondrial membrane permeabilization and energetic collapse. Prevention of mitochondrial  $\text{Ca}^{2+}$  uptake has a protective effect in ischaemia–reperfusion injury.<sup>78,79</sup> However, normoxic healthy mitochondria exhibit a striking ability to accumulate enormous amounts of  $\text{Ca}^{2+}$  and efficiently participate in cellular  $\text{Ca}^{2+}$  buffering along with the sarcoplasmic reticulum (SR).<sup>80</sup> Mitochondrial  $\text{Ca}^{2+}$  uptake and storage capacity may be particularly relevant when cytosolic  $\text{Ca}^{2+}$  is elevated, as during ischaemia. Nevertheless, the concept that mitochondria can shape the spatio-temporal pattern of cytosolic  $\text{Ca}^{2+}$  during ischaemia has been controversial. While mitochondrial membrane depolarization is expected to preclude  $\text{Ca}^{2+}$  uptake through the mitochondrial  $\text{Ca}^{2+}$  uniporter,<sup>81</sup> significant mitochondrial  $\text{Ca}^{2+}$  accumulation has been documented during ischaemia in the presence of residual mitochondrial membrane potential.<sup>55,56</sup> Moreover, pharmacological inhibition of  $\text{Ca}^{2+}$  uptake during ischaemia has been shown to have a pernicious effect on cell survival upon re-energization, an effect that is associated with an impairment of cytosolic  $\text{Ca}^{2+}$  handling,<sup>55</sup> supporting the concept that mitochondrial  $\text{Ca}^{2+}$  uptake helps to delay a rise in cytosolic  $\text{Ca}^{2+}$  levels.

## 3. Intracellular $\text{Ca}^{2+}$ handling during reperfusion

The main mechanisms and consequences of altered  $\text{Ca}^{2+}$  handling during reperfusion are summarized schematically in *Figure 1*.

### 3.1 $\text{Na}^+$ and $\text{Ca}^{2+}$ influx during initial reperfusion

The intracellular  $\text{Na}^+$  overload observed in reperfused cardiomyocytes is largely the consequence of  $\text{Na}^+$  gain during prior ischaemia,<sup>23,24</sup> but also of additional  $\text{Na}^+$  influx at the onset of reperfusion associated with pH<sub>i</sub> correction or  $\text{Na}^+$  influx from adjacent myocytes via gap junctions.<sup>82</sup>

Reperfusion removes extracellular  $\text{H}^+$  and rapidly reactivates intracellular  $\text{H}^+$  efflux mediated by the lactate- $\text{H}^+$  cotransporter<sup>83</sup> and the activity of NHE and  $\text{Na}^+\text{HCO}_3^-$  cotransporter,<sup>83</sup> resulting in a fast pH<sub>i</sub> recovery.<sup>22–23</sup>  $\text{Na}^+$ -NMR studies demonstrate a fast correction in intracellular  $\text{Na}^+$  levels during initial reperfusion even in the presence of NHE inhibitors,<sup>84</sup> which can probably be explained by the compensatory action of bicarbonate transporters and the reactivation of  $\text{Na}^+/\text{K}^+$ -ATPase.<sup>22,85,86</sup>

Reactivation of  $\text{Na}^+/\text{K}^+$ -ATPase appears to be a key determinant of the kinetics of  $\text{Na}^+$  recovery at reperfusion.<sup>87</sup> Whereas after short periods of ischaemia functionality of the  $\text{Na}^+/\text{K}^+$ -ATPase is preserved immediately upon reperfusion,<sup>86,88</sup> it is impaired after prolonged occlusions.<sup>88,89</sup> It has been proposed that oxidation of sulfhydryl groups on the protein,<sup>90</sup> and more recently, calpain-dependent loosening of its alpha subunit from the membrane–cytoskeleton complex,<sup>88</sup> contribute to reperfusion-induced  $\text{Na}^+/\text{K}^+$ -ATPase dysfunction. During the first minutes of reperfusion, cytosolic  $\text{Na}^+$  overload provides a large driving force for  $\text{Ca}^{2+}$  influx through the reverse mode of NCX. Inhibitors of NCX applied at the time of reperfusion reduce the frequency of  $\text{Ca}^{2+}$  oscillations (see below), infarct size, and myocardial stunning in intact hearts, confirming that early reperfusion results in an additional  $\text{Ca}^{2+}$  influx through the reverse-mode operation of NCX.<sup>5,91,92</sup>

### 3.2 SR-driven $\text{Ca}^{2+}$ oscillations and hypercontracture

The SR is the main intracellular  $\text{Ca}^{2+}$  store in cardiac myocytes, orchestrating excitation–contraction coupling through rapid  $\text{Ca}^{2+}$  uptake (SERCA ATPase) and release transport system (ryanodine receptor, RyR) facilitated by a close juxtaposition with T-tubules and mitochondria.<sup>93</sup> Previous studies have indicated that in the presence of an abnormally high cytosolic  $\text{Ca}^{2+}$  concentration, such as that occurring in the very first minutes of reperfusion, a rapid SR  $\text{Ca}^{2+}$  cycling may be the genuine cause of reperfusion-induced hypercontracture.<sup>94,95</sup>  $\text{Ca}^{2+}$  oscillations are the consequence of the reactivation of mitochondrial respiration and efficient ATP transfer to the SR, subsequent  $\text{Ca}^{2+}$  uptake by SERCA ATPase, and  $\text{Ca}^{2+}$  release through RyR when SR storage capacity is exceeded.<sup>94</sup> Importantly, upon resumption of mitochondrial energy synthesis, SERCA ATPase may initiate this futile  $\text{Ca}^{2+}$  cycling before other ATP-dependent sarcolemmal  $\text{Ca}^{2+}$  extruders reduce cytosolic  $\text{Ca}^{2+}$  load, in part due to the privileged spatial communication between SR and mitochondria (see below).  $\text{Ca}^{2+}$  release from a SR unit may be taken up by an adjacent one, and the resulting  $\text{Ca}^{2+}$  oscillation can propagate throughout the cell as  $\text{Ca}^{2+}$  waves that induce hypercontracture. Accordingly, a decrease in the synthesis of ATP necessary to activate SERCA ATPase,<sup>96</sup> pharmacological inhibition of SERCA or RyR,<sup>94,97,98</sup> or a reduction in the cytosolic  $\text{Ca}^{2+}$  load<sup>5,99</sup> decreases the frequency and amplitude of SR-induced  $\text{Ca}^{2+}$  sparks and oscillations and reduces hypercontracture and cell death in different experimental models. Alternatively, the improvement of SR  $\text{Ca}^{2+}$

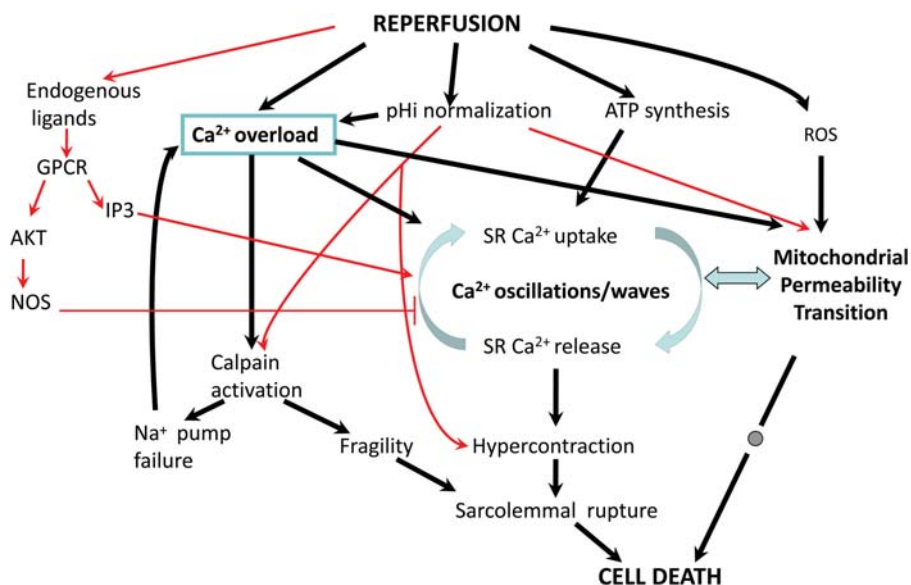

**Figure 1** Mechanisms and consequences of altered  $\text{Ca}^{2+}$  handling in cardiomyocytes during initial reperfusion. Main events are connected through black lines, whereas red lines indicate important modulating factors. GPCR, G-coupled protein receptors; IP3, inositol trisphosphate; NOS, nitric oxide synthase; ROS, reactive oxygen species.

sequestration capacity by protein kinase G (PKG)-dependent phosphorylation of phospholamban (resulting in more efficient SERCA activity) may decrease reperfusion-induced SR  $\text{Ca}^{2+}$  oscillations, favour the recovery of cytosolic  $\text{Ca}^{2+}$  control, and prevent excessive myofibrillar activation during reperfusion.<sup>95,100</sup> These results are in agreement with recent observations indicating that  $\text{Ca}^{2+}$  wave development depends on the balance between SERCA-dependent  $\text{Ca}^{2+}$  reuptake and threshold SR  $\text{Ca}^{2+}$  content<sup>101</sup> and underline the importance of energy-dependent SR-driven  $\text{Ca}^{2+}$  oscillations in the pathophysiology of ischaemia–reperfusion.

### 3.3 Role of mitochondria–SR interaction in hypercontracture and MPT

Two subpopulations of mitochondria, subsarcolemmal (SSM) and interfibrillar (IFM), have been described,<sup>102</sup> with differences in morphology,<sup>103</sup> functional capacity,<sup>102,104</sup> and, more importantly, differential interactions with other cellular components, as only IFM is in close contact with the SR. Mitochondria and SR are structurally and functionally interconnected, and this interplay has important pathophysiological consequences that go beyond the individual role of each organelle.<sup>105,106</sup> It has been demonstrated that SR  $\text{Ca}^{2+}$  uptake may be altered when creatine kinase activity from IFM is specifically depressed.<sup>107</sup> As a consequence, the highly specialized energy transfer and  $\text{Ca}^{2+}$  exchange system formed by SR, IFM, and myofilaments becomes less efficient and may account for the mismatch between energy demand/utilization and  $\text{Ca}^{2+}$  uptake/release (contractile force) that is observed under certain pathological conditions, such as heart failure.<sup>107</sup> During reperfusion, microdomains of high  $\text{Ca}^{2+}$  concentration around RyR of the SR have been proposed to be involved in the permeabilization of mitochondria located in close proximity.<sup>97,98</sup>

Accordingly, pharmacological blockade of SR  $\text{Ca}^{2+}$  load with thapsigargin/ryanodine impacted on mitochondrial  $\text{Ca}^{2+}$  uptake kinetics in intact cardiac myocytes, but had no effect in isolated mitochondria, where the contribution of SR is expected to be negligible.<sup>98</sup> The distance between SR and mitochondria has been estimated to be 10–50 nm,<sup>108</sup> and mitofusin 2 has been identified as the main mediator of the physical link among the two organelles.<sup>109</sup> Chemical disruption of the microtubule network increases the inter-organelle distance and reduces the noxious effect that the SR-induced  $\text{Ca}^{2+}$  oscillations exert on mitochondrial integrity during the first minutes of reperfusion.<sup>98</sup> The differences in  $\text{Ca}^{2+}$  crosstalk with SR may explain in part why IFM have a higher  $\text{Ca}^{2+}$  retention capacity,<sup>102</sup> and this difference in  $\text{Ca}^{2+}$  tolerance may exacerbate cellular stress during reperfusion, when damaged mitochondria (releasing  $\text{Ca}^{2+}$  as well as other molecules) coexist along with intact mitochondria (capable of sustaining ATP synthesis) within the same cell. Moreover, the relationship between SR and mitochondria appears to be bidirectional: SR-induced  $\text{Ca}^{2+}$  cycling may favour mitochondrial permeabilization and energetic collapse on one hand,<sup>97,98,110</sup> whereas mitochondrial permeabilization may trigger SR  $\text{Ca}^{2+}$  oscillations, hypercontracture, and cell death during reperfusion by increasing cytosolic  $\text{Ca}^{2+}$  overload<sup>111</sup> on the other hand. Thus, early pharmacologic inhibition of SR  $\text{Ca}^{2+}$  uptake and release upon re-energization reduces MPT, hypercontracture, and cell death,<sup>98</sup> and genetic or chemical blockade of mitochondrial permeabilization decreases hypercontracture and infarct size.<sup>112</sup>

### 3.4 Normalization of intracellular pH

A rapid correction of acidosis during reperfusion contributes to  $\text{Ca}^{2+}$  influx and, furthermore, may precipitate the adverse effects of  $\text{Ca}^{2+}$

overload that remain inhibited at low pHi. Normalization of pHi allows the activation of critical proteins involved in the regulation of  $\text{Ca}^{2+}$  handling, including NCX,<sup>22,113</sup> the L-type  $\text{Ca}^{2+}$  channel,<sup>114</sup> the RyR,<sup>115</sup> and SERCA.<sup>116</sup> Even a brief prolongation of extracellular acidosis during the early phase of reoxygenation reduces  $\text{Ca}^{2+}$  overload.<sup>117</sup> Recovery from pHi also relieves the inhibition of cardiomyocyte contractility caused by a reduced  $\text{Ca}^{2+}$  binding to troponin C,<sup>118</sup> the occurrence of MPT,<sup>119,120</sup> activation of calpains,<sup>75</sup> and blockade of gap junctions.<sup>121</sup> Therefore, the relative timing of the correction of intracellular  $\text{Ca}^{2+}$  levels and pHi during the first minutes of reperfusion has been proposed to determine cell death (recovery of pHi occurs before that of  $\text{Ca}^{2+}$ ) or survival (recovery of  $\text{Ca}^{2+}$  control occurs before pHi normalization). This hypothesis may help explain the cardioprotective effect of brief acidic reperfusion and ischaemic postconditioning.<sup>122</sup>

### 3.5 Extracellular signalling modulating intracellular $\text{Ca}^{2+}$

The intracellular  $\text{Ca}^{2+}$  concentration can be modulated by a number of extracellular signals during reperfusion. Activation of membrane-bound guanylyl cyclase with natriuretic peptides or soluble guanylyl cyclase with NO donors increases the cGMP synthesis, which in turn activates PKG. PKG has been shown to activate SERCA through phosphorylation of phospholamban, increasing  $\text{Ca}^{2+}$  accumulation by the SR and preventing cytosolic  $\text{Ca}^{2+}$  oscillations.<sup>123</sup>

G protein-coupled receptors (GPCRs) might also play a relevant role under ischaemia–reperfusion in modulating intracellular  $\text{Ca}^{2+}$  levels through two opposing mechanisms. Activation of  $G_{\alpha q/11}$  by most GPCRs results in the hydrolysis of membrane-bound phosphatidylinositol 4,5-bisphosphate (PIP2) by phospholipase C $\beta$ , releasing inositol 1,2,5-trisphosphate (IP3). This molecule binds to its intracellular receptors (IP3R), inducing the release of  $\text{Ca}^{2+}$  from the endoplasmic reticulum to the cytosol.<sup>124</sup> On the other hand, binding of a ligand to its GPCR also leads, probably through the  $\beta\gamma$  subunits of the G proteins, to serial activation of phosphoinositide 3-kinase (PI3K), Akt, ERK, nitric oxide synthase (NOS), and guanylyl cyclase, which results in increased levels of intracellular cGMP, activation of SERCA through PKG-mediated phosphorylation of phospholamban, and uptake of  $\text{Ca}^{2+}$  by the SR.<sup>123</sup> Adenosine, ATP (P2Y receptors), opioids, bradykinin, adrenaline, acetylcholine, insulin, erythropoietin, oestrogens, transforming growth factor- $\beta$ 1, angiotensin II, and adrenomedullin are endogenous ligands that may modulate intracellular  $\text{Ca}^{2+}$  by binding to GPCR. Most of them have been shown to activate the PI3K/Akt/ERK/NOS signalling pathway and to be involved in cardioprotection by pre- and postconditioning.<sup>125</sup> Similarly, extracellular  $\text{Ca}^{2+}$ -sensing receptors are GPCR that can play a role in regulation of the intracellular  $\text{Ca}^{2+}$  concentration and have been shown to be involved in ischaemia/reperfusion-induced apoptosis in rat cardiomyocytes by increasing the intracellular  $\text{Ca}^{2+}$  concentration.<sup>126</sup> On the other hand,  $\text{Ca}^{2+}$ -sensing receptors have been suggested to play a role in preconditioning protection in isolated mouse hearts.<sup>127</sup> Protease-activated receptors, such as thrombin receptors, are specialized GPCR. Thrombin activates its receptor by cleaving part of its extracellular amino-terminal domain, promoting coupling with  $G_{\alpha\beta\gamma}$  proteins, and modulating the intracellular  $\text{Ca}^{2+}$  concentration. Thrombin has been shown to increase cytosolic  $\text{Ca}^{2+}$  and twitch amplitude in isolated rat cardiomyocytes<sup>128</sup> and to cause cell death after ischaemia–reperfusion.<sup>129</sup>

## 4. The end-effectors of $\text{Ca}^{2+}$ -dependent cardiomyocyte death during reperfusion

Altered  $\text{Ca}^{2+}$  handling may trigger processes that directly cause cell death such as hypercontracture, proteolysis, and MPT.

### 4.1 Hypercontracture

The role of mechanical stress generated by an excessive contractile activation, known as hypercontracture, in the development of cardiomyocyte death during reperfusion is supported by ample experimental evidence.<sup>10,130,131</sup> Hypercontracture has been observed during the first minutes of reperfusion *in vitro* by microscopic techniques, and *in vivo* by intramyocardial ultrasonometry.<sup>130,132</sup> There is a close correlation between the magnitude and time course of hypercontracture and enzyme release in reperfused myocardium.<sup>112,130</sup> Brief contractile inhibition at the onset of reperfusion prevents enzyme release for the time the inhibition is present, while prolonged contractile inhibition limits final infarct size.<sup>88,133,134</sup>

Hypercontracture is induced by recovery of energy production in the presence of a high cytosolic  $\text{Ca}^{2+}$  concentration<sup>132</sup> (Figure 2). Cytosolic  $\text{Ca}^{2+}$  oscillations lead to sustained and uncontrolled activation of the contractile apparatus that results in hypercontracture.<sup>131,135</sup> Isolated, unrestrained cardiomyocytes, but not those restrained by attachment to a micropipette,<sup>136</sup> can maintain sarcolemmal and metabolic integrity after hypercontracture.<sup>12,137</sup> However, in tissue, the mechanical forces resulting from hypercontraction of adjacent cells lead to mutual cellular disruption and necrosis.<sup>138,139</sup>

NMR spectroscopy shows rapid and virtually complete but transient energy recovery in hearts undergoing hypercontracture and important necrosis after transient ischaemia, demonstrating that hypercontracture is not due to low ATP levels in those experiments.<sup>112</sup> Furthermore, contractile blockade prevents cell death (LDH release) and cell de-energization, indicating that the fall in energy is not a cause but a consequence of hypercontracture.

It has been proposed that rigor-type,  $\text{Ca}^{2+}$ -independent activation of the contractile machinery contributes to hypercontracture, at least under certain conditions.<sup>140</sup> Rigor-type contracture may be activated during reoxygenation if re-energization of the ischaemic cardiomyocytes occurs at a very low rate as after prolonged or severe ischaemia.<sup>40,141</sup> It is unclear, however, under which pathophysiological conditions *in vivo* this state of very slow, but non-zero re-energization required for rigor-type contracture may actually prevail. It is not expected to occur when ATP levels are rapidly restored after brief ischaemia or when reactivation of mitochondrial respiration completely fails or is effectively suppressed.<sup>142,143</sup>

### 4.2 Calpain-mediated proteolysis

During reperfusion calpains hydrolyze proteins from the sarcolemma and the cytoskeleton, including  $\alpha$ -fodrin and ankyrin.  $\alpha$ -Fodrin forms the backbone of the membrane cytoskeleton. Its degradation correlates with increased fragility of the membrane, reducing the tolerance of the sarcolemma to the mechanical stress associated with hypercontracture and acute cell swelling during reperfusion.<sup>71,74,144</sup> Ankyrin has a central domain that binds to  $\alpha$ -fodrin and an N-terminal domain that interacts with several receptors and channels, including the  $\alpha$  subunit of  $\text{Na}^+/\text{K}^+$ -ATPase.<sup>145</sup> Binding to ankyrin connects  $\text{Na}^+/\text{K}^+$ -ATPase to the fodrin-based membrane cytoskeleton and determines its

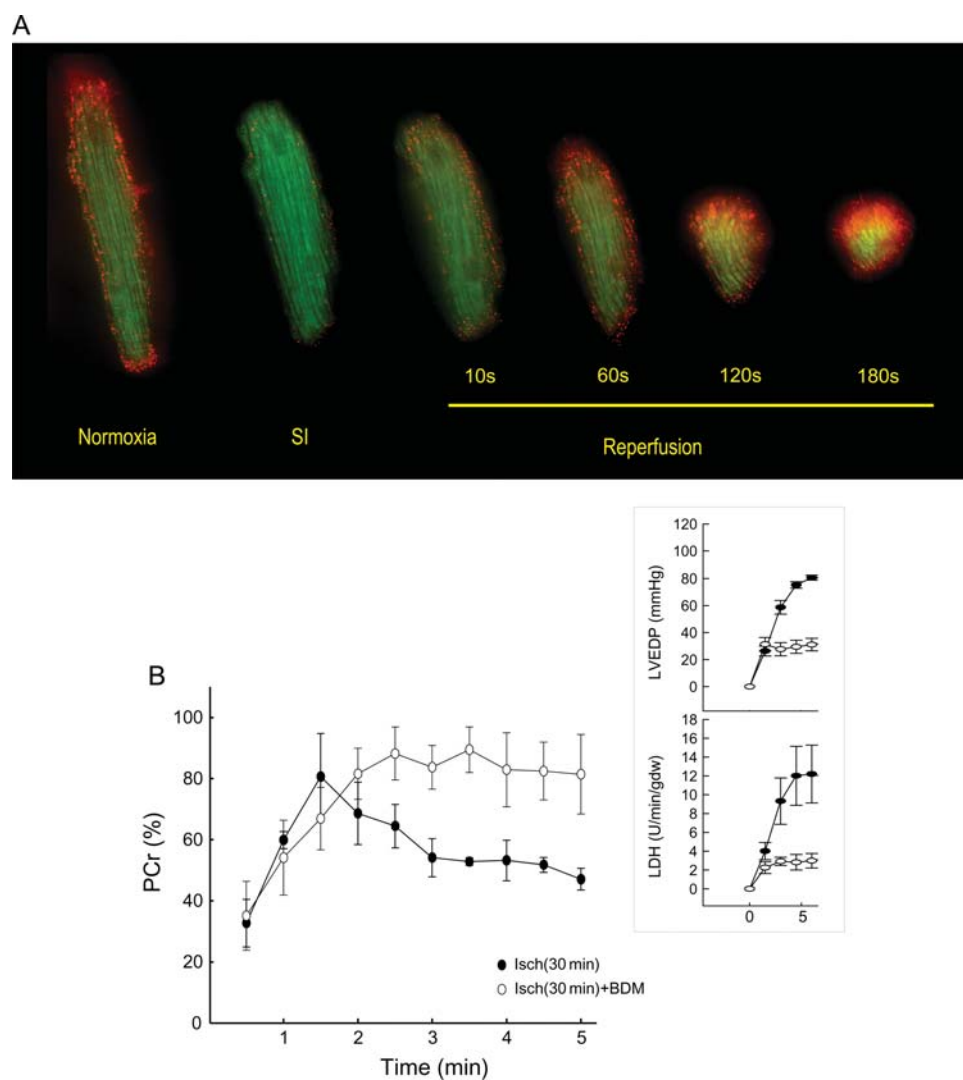

**Figure 2** (A) Calcium and energy-dependent hypercontracture. Simulated ischaemia (SI, exposure to hypoxia at pH 6.4) and reperfusion in myocytes from adult rat heart labelled with JC-1 (5',6,6'-tetrachloro-1,1',3,3'-tetraethylbenzimidazolylcarbocyanine iodide) to study mitochondrial membrane potential. Ischaemia causes loss of membrane potential (disappearance of the red signal) and rigour shortening. Reperfusion causes recovery of mitochondrial membrane potential and hypercontracture. (From ref. 112; used with permission). (B) Analysis of recovery of cell energy (% of phosphocreatine, PCr) by NMR spectroscopy during the initial minutes of reperfusion in rat hearts submitted to 30 min of ischaemia. There is an initial recovery followed by de-energization that is prevented by contractile blockade. The inset shows that de-energization occurring in the control group is coincident with the development of hypercontracture that is manifested as an increase in left ventricular end-diastolic pressure (LVEDP) with lactic dehydrogenase (LDH) release reflecting sarcolemmal rupture, both prevented by contractile blockade with BDM. Altogether, these results indicate that de-energization is a consequence of hypercontracture-mediated cell death and not a cause of it. (Modified from ref. 112; with permission).

specific localization in the membrane and its correct function.<sup>146</sup> During reperfusion, calpain degradation of both fodrin and ankyrin not only causes sarcolemmal fragility but also detachment of the Na<sup>+</sup> pump from its anchorage to the fodrin-based membrane skeleton, inducing dysfunction of the sarcolemmal Na<sup>+</sup> pump. This results in impaired normalization of the cytosolic Na<sup>+</sup> concentration and in further Ca<sup>2+</sup> influx via reverse-mode NCX.<sup>88</sup> It has been proposed that calpain can also modulate Ca<sup>2+</sup> handling by cleaving RyR<sup>147</sup> and SERCA2a.<sup>148</sup> In addition, calpain-dependent activation of Bid has been described to induce the release of cytochrome c and other proapoptotic factors.<sup>149</sup> Calpain inhibition reduces infarct size in different models<sup>72,75</sup> and has been proposed to be an important

element in the cardioprotective effect of pre- and postconditioning.<sup>23,71</sup>

### 4.3 Mitochondrial permeability transition

Upon reperfusion, cytosolic Ca<sup>2+</sup> overload in the presence of mitochondrial repolarization (although incomplete) provides the electrochemical force necessary to activate mitochondrial Ca<sup>2+</sup> uptake through the Ca<sup>2+</sup> uniporter. However, cumulative Ca<sup>2+</sup> capacity of reperfused mitochondria is severely impaired, mainly as a consequence of the concurrence of oxidative stress and low cellular ATP concentration, conditions that may initiate mitochondrial failure upon Ca<sup>2+</sup> uptake when intracellular pH is normalized.<sup>14–16</sup>

Mitochondrial failure occurs as a consequence of the abrupt increase in the permeability of mitochondrial membranes that are incompatible with efficient respiration and ATP synthesis. This phenomenon, known as mitochondrial membrane permeabilization, was initially described *in vitro* as a response specifically induced by  $\text{Ca}^{2+}$ .<sup>17</sup> It appears to be mediated by cyclophilin D (CyD), a trans-isomerase protein located at the inner mitochondrial membrane, although other indirect mechanisms of mitochondrial permeabilization have been described.<sup>150,151</sup> Genetic ablation of CyD or its pharmacological inhibition by CsA or other drugs increases mitochondrial tolerance to  $\text{Ca}^{2+}$  overload and reduces cell death after transient ischaemia in different experimental models.<sup>152–154</sup> In fact, tolerance to external  $\text{Ca}^{2+}$  pulses of mitochondria isolated from reperfused myocardium has been used as an index of the susceptibility of the myocardium to MPT under different conditions, including cardioprotective interventions.<sup>152</sup> However, the causal role of mitochondrial  $\text{Ca}^{2+}$  tolerance as a mechanism of attenuated MPT during *in vivo* reperfusion remains obscure, and other triggers, in particular ROS, have been demonstrated to be more important in intact myocardium.<sup>155</sup> Indeed, the  $\text{Ca}^{2+}$  threshold upon which isolated mitochondria experience acute failure *in vitro* (high micromolar range) could only be achieved *in vivo* as the consequence of sarcolemmal disruption, resulting in massive  $\text{Ca}^{2+}$  entry from the extracellular space. However, studies using engineering-based fluorescent techniques have demonstrated that  $\text{Ca}^{2+}$  concentrations can be dramatically increased in specific microanatomical domains, reaching levels that are well above the concentration achieved in the bulk of cytoplasm,<sup>156</sup> and more recent evidence indicates that these microdomains may explain the occurrence of reperfusion-induced mitochondrial permeabilization in some cellular regions.<sup>97,98</sup> Moreover, the possibility that a subpopulation of intact, energy-producing mitochondria coexist with severely damaged mitochondria undergoing membrane permeabilization has been proposed as the mechanism reconciling both ATP-dependent hypercontracture and mitochondrial failure as the cause of reperfusion-induced cell death, because membrane permeabilization of mitochondria previously overloaded with  $\text{Ca}^{2+}$  may further impair cytosolic  $\text{Ca}^{2+}$  handling.<sup>111</sup>

#### 4.4 Relative importance of $\text{Ca}^{2+}$ -driven hypercontracture and MPT as causes of cell death

Occurrence of MPT in a subset of mitochondria releases  $\text{Ca}^{2+}$  into the cytosol, favouring  $\text{Ca}^{2+}$  oscillations/overload that eventually lead to hypercontracture. Conversely, uncontrolled SR-triggered  $\text{Ca}^{2+}$  oscillations may induce MPT in mitochondria located in close proximity to the SR. In addition, it is also possible that both mechanisms of cell death operate separately: altered  $\text{Ca}^{2+}$  handling can cause cell death through calpain-mediated proteolysis and hypercontracture independently of MPT, whereas MPT can be the primary cause of cell death during reperfusion. In fact, reperfusion-induced cell death occurs in cells other than cardiomyocytes that lack significant contractile machinery, such as hepatocytes, neurons, or modified cardiomyocyte cell lines.<sup>120,157</sup> The question of the relationship and relative importance of these different cell death mechanisms during myocardial reperfusion is thus relevant. We recently proposed that the relative contribution of MPT to cell death depends on the duration of prior ischaemia. After brief periods of ischaemia, inhibition of mitochondrial permeabilization with CsA or genetic ablation of CyD

failed to protect isolated cardiomyocytes or intact hearts from reperfusion injury, whereas prevention of  $\text{Ca}^{2+}$ -induced, energy-dependent hypercontracture was effective. Conversely, after more prolonged ischaemia, inhibition of MPT was strongly protective.<sup>112</sup>

#### 4.5 Role of apoptosis

$\text{Ca}^{2+}$  overload is an established trigger of apoptosis, and it has been proposed that it can induce apoptosis of cardiomyocytes even when its magnitude is lower than that required to induce necrosis, as may occur, for example, during inotropic stimulation.<sup>158</sup> It is thus theoretically possible that  $\text{Ca}^{2+}$  overload can induce apoptotic cell death in cardiomyocytes surviving the initial minutes of reperfusion. There are, however, reasons to believe that this is not a relevant cause of cell death. Most studies agree that infarct size, determined early during reperfusion, does not increase significantly during the following hours.<sup>159,160</sup> Furthermore, there is solid evidence that the caspase pathway responsible for mitochondria-driven apoptosis is not operative in adult cardiomyocytes.<sup>161</sup>

### 5. Pharmacological targets against $\text{Ca}^{2+}$ -mediated reperfusion injury

#### 5.1 Improving $\text{Ca}^{2+}$ handling

The value of cell systems involved in exaggerated  $\text{Ca}^{2+}$  influx during reperfusion as pharmacological targets to be used against reperfusion injury has been discussed in previous sections and in other articles.<sup>162</sup> We will focus here on the potential value of systems involved in intracellular  $\text{Ca}^{2+}$  handling as therapeutic targets.

SERCA activity is specifically regulated by phospholamban (PLB), which in its dephosphorylated form exerts an inhibitory effect, susceptible to be relieved after its phosphorylation by either cAMP- or cGMP-dependent protein kinases or the  $\text{Ca}^{2+}$ -calmodulin-dependent protein kinase (CaMKII).<sup>163</sup> Because ischaemia induces dephosphorylation of PLB,<sup>164</sup> modulation of the phosphorylation status of PLB has attracted much attention as a potential therapeutic strategy to reduce reperfusion injury. Calcineurin inhibitors (e.g. CsA) have been demonstrated to prevent PLB dephosphorylation by inhibiting PKC- $\alpha$  translocation.<sup>164</sup> Hsp20 has been recently identified as a modulator of PLB phosphorylation,<sup>165</sup> but its potential value as a pharmacological target remains to be established. Natriuretic peptides increase PLB phosphorylation via PKG and are cardioprotective.<sup>166</sup> B-type natriuretic peptide also inhibits the mitochondrial  $\text{Ca}^{2+}$  uniporter, reduces ROS generation, and improves mitochondrial energy recovery.<sup>167</sup> It may seem paradoxical that an increase in CaMKII activity has been found to decrease cell viability in rat hearts and isolated myocytes subjected to transient ischaemia–reperfusion, an effect that could be reverted in the presence of the CaMKII inhibitor KN-93 or the CaMKII inhibitory peptide AIP<sup>168</sup>: the adverse effect of CaMKII may, however, be due to its effect on targets other than PLB.

Regulation of the crosstalk between SR and mitochondria is emerging as a new target to limit cell death. A recent report indicates that postconditioning may protect cardiomyocytes from apoptotic death induced by transient ischaemia by preserving crosstalk between mitochondria and the SR.<sup>169</sup> In some cases, drugs known for their effects on sarcolemmal ionic exchangers have been shown to inhibit mitochondrial transporters. It has been suggested that part of the protective effect of cariporide against ischaemic damage is due to its inhibitory effect on mitochondrial NHE exchange that delays  $\Delta\Psi_m$

dissipation and  $\text{Ca}^{2+}$  disturbances associated with energy depletion.<sup>53</sup> Also, the plasma membrane NCX inhibitor KB-R7943 may inhibit the mitochondrial  $\text{Ca}^{2+}$  uniporter and prevent mitochondrial  $\text{Ca}^{2+}$  overload during ischaemia–reperfusion in addition to its effect on cytosolic  $\text{Ca}^{2+}$  levels.<sup>170</sup>

## 5.2 Attenuating the consequences of $\text{Ca}^{2+}$ overload

A major limitation of strategies aimed towards limiting  $\text{Ca}^{2+}$  overload during reperfusion is that they cannot prevent its accumulation occurring during preceding ischaemia. An alternative approach is to inhibit  $\text{Ca}^{2+}$ -dependent effects of reperfusion injury.

Contractile inhibitors prevent enzyme release during initial reperfusion<sup>88,133</sup> and limit infarct size.<sup>134,171</sup> The drug most extensively used for this purpose has been 2,3-butanedione monoxime (BDM), a reversible blocker of actomyosin-ATPase. Recently, a new contractile inhibitor, blebbistatin, has been shown to inhibit contractility with a potency that is three orders of magnitude higher.<sup>172</sup> The dramatic effect blebbistatin has on the reduction of infarct size when administered to isolated rat hearts (unpublished results from our group) makes this drug a potential candidate for translation.

The cardioprotective effects obtained with some strategies aimed at preventing mechanisms other than hypercontracture could be explained, at least in part, by their actions on contractility. Delay in pHi recovery induced by pharmacological treatments,<sup>22,85</sup> transient reperfusion with respiratory or metabolic acidosis<sup>4,22</sup> or postconditioning<sup>23</sup> inhibits myofibrillar contractility during initial reperfusion. Similarly, cardioprotection afforded by stimulation of the cGMP/PKG pathway<sup>100,173,174</sup> has been related to PKG-dependent effects on the sensitivity of myofibrils to  $\text{Ca}^{2+}$ .<sup>175,176</sup> Moreover, activation of PKG may delay pHi normalization through inhibition of NHE.<sup>177</sup>

The fact that  $\text{Ca}^{2+}$ -dependent overactivation of calpains occurs during reperfusion after pHi normalization makes them suitable pharmacological targets for the prevention of reperfusion injury. It has been reported that the administration of calpain inhibitors during the acute phase of reperfusion is effective in reducing infarct size.<sup>75,178,179</sup> However, some of the data that have been generated when the effects of prolonged calpain inhibition are investigated have been more controversial. Whereas in some studies, calpastatin overexpression in diabetic and hypertensive models attenuates the development of cardiac hypertrophy,<sup>180,181</sup> in other studies chronic inhibition results in cardiomyocyte degeneration and heart failure.<sup>182</sup> Further confirmation of the effectiveness of calpain inhibition in more clinically relevant experimental models and the development of more selective inhibitors are needed to confirm the therapeutic potential of calpain inhibition.

Inhibition of MPT opening with cyclosporin A may, under some conditions, reduce the release of mitochondrial  $\text{Ca}^{2+}$  and attenuate hypercontracture.<sup>111</sup> Prolongation of acidosis by postconditioning is supposed to inhibit MPT.<sup>183</sup> Also, protection induced by stimulation of the PKG signalling pathway has been interpreted as being mediated by the inhibition of MPT,<sup>184</sup> although a direct effect of this pathway on SR  $\text{Ca}^{2+}$  handling is also likely to contribute.<sup>100,185</sup> It is important to remark that the mechanisms by which inhibition of MPT may prevent sarcolemmal disruption in the first minutes of reperfusion, when the cytosolic  $\text{Ca}^{2+}$  concentration remains abnormally elevated, is not known.

## 6. Clinical studies

Even though L-type  $\text{Ca}^{2+}$  channels may play some role in the development of  $\text{Ca}^{2+}$  overload in ischaemic cardiomyocytes (see above), there is no evidence of a protective effect of  $\text{Ca}^{2+}$  channel blockers in the setting of acute myocardial infarction. In a small clinical study ( $n = 36$ ), intracoronary nisoldipine given at the onset of reperfusion increased the ejection fraction.<sup>186</sup> In contrast, in the DATA trial ( $n = 59$ ), no effects on ejection fraction or enzyme release were observed after i.v. administration of diltiazem.<sup>187</sup>

No NCX inhibitors have been approved for human use, and thus, there are no clinical trials on this target. However, calderet (MCC-135) is an intracellular  $\text{Ca}^{2+}$  handling modulator that is expected to inhibit, among other targets, the reverse-mode NCX and SR  $\text{Ca}^{2+}$  uptake. Calderet has been shown to reduce infarct size in the *in situ* dog heart when given i.v. at the end of ischaemia.<sup>188</sup> In the CASTEMI and EVOLVE randomized trials ( $n = 387$ ), i.v. administration of calderet (MCC-135) did not modify infarct size or ejection fraction.<sup>189,190</sup>

The pharmacologic approach that has been more widely tested in patients to limit  $\text{Ca}^{2+}$  overload is NHE inhibition. The GUARDIAN study ( $n = 11\,590$ ) did not show any benefit of cariporide on death or myocardial infarction in patients undergoing thrombolysis or coronary revascularization.<sup>191</sup> Similar lack of efficacy after eniporide administration at reperfusion was reported in the ESCAMI trial ( $n = 1389$ ).<sup>192</sup> This lack of efficacy when given at the onset of reperfusion is in contrast with results obtained in trials in which NHE inhibitors were given before ischaemia, as in the EXPEDITION study,<sup>193</sup> and are fully consistent with preclinical studies showing that NHE inhibition protects against ischaemic injury but not against reperfusion injury, i.e. these agents need to be given before ischaemia to be effective.

Improved  $\text{Ca}^{2+}$  handling could be beneficial based on the positive results of the J-WIND-ANP trial,<sup>194</sup> in which patients with acute myocardial infarction receiving reperfusion therapy were given i.v. ANP or placebo. Patients treated with ANP showed a reduction in infarct size and an increase in ejection fraction. On the other hand, clinical evidence regarding the use of NO donors in the setting of acute myocardial infarction remains inconclusive: intracoronary sodium nitroprusside has been shown to reduce major adverse cardiac events,<sup>195</sup> whereas no benefit was observed with isosorbide mononitrate.<sup>196</sup>

Finally, pharmacologic inhibition of  $\text{Ca}^{2+}$ -induced MPT with cyclosporin A has been found able to prevent cell death during reperfusion in patients with acute myocardial infarction submitted to coronary angioplasty.<sup>197</sup> However, these promising results await confirmation in larger clinical trials.

In summary, there is a lack of clinically promising therapeutic strategies specifically addressing  $\text{Ca}^{2+}$ -mediated myocardial reperfusion injury, but in all strategies found to be protective in patients the beneficial effect can be explained at least in part by well-demonstrated effects on  $\text{Ca}^{2+}$ -mediated injury. A clear example of this is ischaemic postconditioning, a sequence of brief periods of ischaemia–reperfusion induced by repeated cycles of balloon-catheter inflation and deflation immediately applied after reopening of an occluded vessel. In experimental studies, ischaemic postconditioning has been shown to prolong acidosis and activate PKG signalling,<sup>177</sup> which result, through the mechanisms discussed above, in improved  $\text{Ca}^{2+}$  handling



and reduced  $\text{Ca}^{2+}$ -mediated calpain activation, hypercontracture, and permeability transition.<sup>122</sup>

## 7. Other potential modulators of $\text{Ca}^{2+}$ handling during reperfusion

$\text{Ca}^{2+}$ -mediated reperfusion injury could be modulated by age, sex, comorbidities, and life style, and other clinically relevant conditions. The reported reduced tolerance to ischaemia of aged hearts<sup>198</sup> appears to be partially due to impaired  $\text{Ca}^{2+}$  handling. Aged hearts showed worsened  $\text{Ca}^{2+}$  overload and reduced functional recovery in isolated heart models.<sup>199</sup> The ability of SR to take up  $\text{Ca}^{2+}$  appears to decrease with advanced age, while the contribution of NCX appears to increase.<sup>200</sup> However, the effect of age could be different on different pathways of reperfusion injury. A recent report describes attenuated hypercontracture and necrosis and improved functional recovery after brief (30 min) global ischaemia in adult when compared with young guinea-pig hearts.<sup>201</sup>

There is ample evidence that sex may influence  $\text{Ca}^{2+}$  handling and tolerance to ischaemia–reperfusion injury. Testosterone increases  $\text{Ca}^{2+}$  transient amplitude and accelerates  $\text{Ca}^{2+}$  removal during relaxation,<sup>202</sup> and ovariectomy increases RyR  $\text{Ca}^{2+}$  release and NCX activity in rat hearts.<sup>203</sup> Part of the influence of sex on  $\text{Ca}^{2+}$  handling and cardioprotection could be mediated through enhanced PIK3-Akt-mediated PKG signalling in female hearts.<sup>204</sup> Of course, the protective effect of estrogens on reperfusion injury may be mediated to a large extent by primarily  $\text{Ca}^{2+}$ -independent mechanisms.<sup>205</sup>

Lifestyle (diet, exercise, stress, contamination) influences  $\text{Ca}^{2+}$  regulation in ways that can modify myocardial injury during ischaemia–reperfusion, and it may contribute to their effect on cardiovascular mortality. Animal studies and epidemiological evidence are consistent with the notion that exercise, when intense enough (approximately 75% of maximal oxygen consumption), activates a protective phenotype that limits infarct size secondary to subsequent transient coronary occlusion<sup>206</sup> and reduces spontaneous  $\text{Ca}^{2+}$  waves in post-infarction failing cardiomyocytes.<sup>207</sup> Exposure to carbon monoxide (CO) reduces tolerance to ischaemia in part by reducing SERCA and thus altering SR function,<sup>208</sup> in agreement with epidemiological evidence linking mortality secondary to myocardial infarction with exposure to urban CO.

## 8. Conclusions

Reperfusion injury has become an important part of the current scientific paradigm of tissue damage secondary to ischaemia in the heart, and this applies also to other organs. At the same time, the role of alterations in intracellular  $\text{Ca}^{2+}$  handling in its genesis has lost weight in favour of other mechanisms that can operate, mainly through MPT. Although the importance of these mechanisms is unquestionable, available data indicate that, in cardiomyocytes, altered  $\text{Ca}^{2+}$  handling may directly cause cell death through calpain-mediated proteolysis, hypercontracture, and, likely, MPT. These mechanisms appear to be critical in necrotic cell death occurring during the initial minutes of reperfusion, particularly after brief periods of ischaemia. Developing effective and safe treatments to prevent  $\text{Ca}^{2+}$ -mediated cell death in patients with acute myocardial infarction remains a challenge that needs to be met. The main difficulty in this

task is the small-time window after reperfusion onset during which  $\text{Ca}^{2+}$ -mediated injury can be prevented. However, the widespread use of primary angioplasty in patients with acute myocardial infarction offers the opportunity to selectively apply treatments to the area at risk at the very onset of reperfusion.

**Conflict of interest:** none declared.

## Funding

Supported by the Spanish Ministry of Science and Instituto de Salud Carlos III (RETICS-RECAVA RD06/0014/0025; CICYT SAF/2008-03067, FIS-PI080238, and PS09/02034). A.R.-S. is recipient of a contract from Generalitat de Catalunya (Programa d'estabilització d'investigadors Miguel Servet, Departament de Salut).

## References

- Dirksen MT, Laarman GJ, Simoons ML, Duncker DJ. Reperfusion injury in humans: a review of clinical trials on reperfusion injury inhibitory strategies. *Cardiovasc Res* 2007;**74**:343–355.
- Prasad A, Stone GW, Holmes DR, Gersh B. Reperfusion injury, microvascular dysfunction, and cardioprotection: the 'dark side' of reperfusion. *Circulation* 2009;**120**:2105–2112.
- Garcia-Dorado D, Ruiz-Meana M, Piper HM. Lethal reperfusion injury in acute myocardial infarction: facts and unresolved issues. *Cardiovasc Res* 2009;**83**:165–168.
- Rodriguez-Sinovas A, Cabestrero A, Garcia DB, Insete J, Garcia A, Garcia-Dorado D. Intracoronary acid infusion as an alternative to ischemic postconditioning in pigs. *Basic Res Cardiol* 2009;**104**:761–771.
- Insete J, Garcia-Dorado D, Ruiz-Meana M, Padilla F, Barrabes JA, Pina P et al. Effect of inhibition of  $\text{Na}^{+}/\text{Ca}^{2+}$  exchanger at the time of myocardial reperfusion on hypercontracture and cell death. *Cardiovasc Res* 2002;**55**:739–748.
- Eltzschig HK, Eckle T. Ischemia and reperfusion—from mechanism to translation. *Nat Med* 2011;**17**:1391–1401.
- Kloner RA, Ganote CE, Whalen DA Jr, Jennings RB. Effect of a transient period of ischemia on myocardial cells. II. Fine structure during the first few minutes of reflow. *Am J Pathol* 1974;**74**:399–422.
- Bush LR, Schlafer M, Haack DW, Lucchesi BR. Time-dependent changes in canine cardiac mitochondrial function and ultrastructure resulting from coronary occlusion and reperfusion. *Basic Res Cardiol* 1980;**75**:555–571.
- Piper HM. The calcium paradox revisited: an artefact of great heuristic value. *Cardiovasc Res* 2000;**45**:123–127.
- Miyazaki S, Fujiwara H, Onodera T, Kihara Y, Matsuda M, Wu DJ et al. Quantitative analysis of contraction band and coagulation necrosis after ischemia and reperfusion in the porcine heart. *Circulation* 1987;**75**:1074–1082.
- Hearse DJ, Humphrey SM, Bullock GR. The oxygen paradox and the calcium paradox: two facets of the same problem? *J Mol Cell Cardiol* 1978;**10**:641–668.
- Piper HM, Siegmund B, Schluter KD. Prevention of the oxygen paradox in the isolated cardiomyocyte and the whole heart. *Am J Cardiovasc Pathol* 1992;**4**:115–122.
- Garcia-Dorado D, Theroux P, Duran JM, Solares J, Alonso J, Sanz E et al. Selective inhibition of the contractile apparatus. A new approach to modification of infarct size, infarct composition, and infarct geometry during coronary artery occlusion and reperfusion. *Circulation* 1992;**85**:1160–1174.
- Duchen MR, McGuinness O, Brown LA, Crompton M. On the involvement of a cyclosporin A sensitive mitochondrial pore in myocardial reperfusion injury. *Cardiovasc Res* 1993;**27**:1790–1794.
- Di Lisa F, Menabo R, Canton M, Barile M, Bernardi P. Opening of the mitochondrial permeability transition pore causes depletion of mitochondrial and cytosolic  $\text{NAD}^{+}$  and is a causative event in the death of myocytes in posts ischemic reperfusion of the heart. *J Biol Chem* 2001;**276**:2571–2575.
- Griffiths EJ, Halestrap AP. Mitochondrial non-specific pores remain closed during cardiac ischaemia, but open upon reperfusion. *Biochem J* 1995;**307**:93–98.
- Hunter DR, Haworth RA, Southard JH. Relationship between configuration, function, and permeability in calcium-treated mitochondria. *J Biol Chem* 1976;**251**:5069–5077.
- Juhászova M, Zorov DB, Kim SH, Pepe S, Fu Q, Fishbein KW et al. Glycogen synthase kinase-3beta mediates convergence of protection signaling to inhibit the mitochondrial permeability transition pore. *J Clin Invest* 2004;**113**:1535–1549.
- Zorov DB, Filburn CR, Klotz LO, Zweier JL, Sollott SJ. Reactive oxygen species (ROS)-induced ROS release: a new phenomenon accompanying induction of the mitochondrial permeability transition in cardiac myocytes. *J Exp Med* 2000;**192**:1001–1014.
- Kim JS, Jin Y, Lemasters JJ. Reactive oxygen species, but not  $\text{Ca}^{2+}$  overloading, trigger pH- and mitochondrial permeability transition-dependent death of adult rat myocytes after ischemia-reperfusion. *Am J Physiol Heart Circ Physiol* 2006;**290**:H2024–H2034.

21. Smith GL, Donoso P, Bauer CJ, Eisner DA. Relationship between intracellular pH and metabolite concentrations during metabolic inhibition in isolated ferret heart. *J Physiol* 1993;**472**:11–22.
22. Inserte J, Barba I, Hernando V, Abellan A, Ruiz-Meana M, Rodriguez-Sinovas A *et al*. Effect of acidic reperfusion on prolongation of intracellular acidosis and myocardial salvage. *Cardiovasc Res* 2008;**77**:782–790.
23. Inserte J, Barba I, Hernando V, Garcia-Dorado D. Delayed recovery of intracellular acidosis during reperfusion prevents calpain activation and determines protection in postconditioned myocardium. *Cardiovasc Res* 2009;**81**:116–122.
24. Pike MM, Kitakaze M, Marban E. <sup>23</sup>Na-NMR measurements of intracellular sodium in intact perfused ferret hearts during ischemia and reperfusion. *Am J Physiol* 1990;**259**:H1767–H1773.
25. Murphy E, Perlman M, London RE, Steenbergen C. Amiloride delays the ischemia-induced rise in cytosolic free calcium. *Circ Res* 1991;**68**:1250–1258.
26. Hartmann M, Decking UK. Blocking Na<sup>+</sup>/H<sup>+</sup> exchange by cariporide reduces Na<sup>+</sup>-overload in ischemia and is cardioprotective. *J Mol Cell Cardiol* 1999;**31**:1985–1995.
27. ten Hove M, van Emous JG, van Echteld CJ. Na<sup>+</sup> overload during ischemia and reperfusion in rat hearts: comparison of the Na<sup>+</sup>/H<sup>+</sup> exchange blockers EIPA, cariporide and eniporide. *Mol Cell Biochem* 2003;**250**:47–54.
28. Williams IA, Xiao XH, Ju YK, Allen DG. The rise of [Na<sup>+</sup>] (i) during ischemia and reperfusion in the rat heart—underlying mechanisms. *Pflugers Arch* 2007;**454**:903–912.
29. ten Hove M, Jansen MA, Nederhoff MG, van Echteld CJ. Combined blockade of the Na<sup>+</sup> channel and the Na<sup>+</sup>/H<sup>+</sup> exchanger virtually prevents ischemic Na<sup>+</sup> overload in rat hearts. *Mol Cell Biochem* 2007;**297**:101–110.
30. Vaughan-Jones RD, Wu ML. Extracellular H<sup>+</sup> inactivation of Na<sup>+</sup>-H<sup>+</sup> exchange in the sheep cardiac Purkinje fibre. *J Physiol* 1990;**428**:441–466.
31. Xiao XH, Allen DG. Activity of the Na<sup>+</sup>/H<sup>+</sup> exchanger is critical to reperfusion damage and preconditioning in the isolated rat heart. *Cardiovasc Res* 2000;**48**:244–253.
32. Allen DG, Xiao XH. Role of the cardiac Na<sup>+</sup>/H<sup>+</sup> exchanger during ischemia and reperfusion. *Cardiovasc Res* 2003;**57**:934–941.
33. Liu H, Cala PM, Anderson SE. Na/H exchange inhibition protects newborn heart from ischemia/reperfusion injury by limiting Na<sup>+</sup>-dependent Ca<sup>2+</sup> overload. *J Cardiovasc Pharmacol* 2010;**55**:227–233.
34. Jung YS, Kim MY, Kim MJ, Oh KS, Yi KY, Lee S *et al*. Pharmacological profile of KR-33028, a highly selective inhibitor of Na<sup>+</sup>/H<sup>+</sup> exchanger. *Eur J Pharmacol* 2006;**535**:220–227.
35. Wang Y, Meyer JW, Ashraf M, Shull GE. Mice with a null mutation in the NHE1 Na<sup>+</sup>-H<sup>+</sup> exchanger are resistant to cardiac ischemia-reperfusion injury. *Circ Res* 2003;**93**:776–782.
36. Ruiz-Meana M, Garcia-Dorado D, Julia M, Inserte J, Siegmund B, Ladilov Y *et al*. Protective effect of HOE642, a selective blocker of Na<sup>+</sup>-H<sup>+</sup> exchange, against the development of rigor contracture in rat ventricular myocytes. *Exp Physiol* 2000;**85**:17–25.
37. Siegmund B, Ladilov YV, Piper HM. Importance of sodium for recovery of calcium control in reoxygenated cardiomyocytes. *Am J Physiol* 1994;**267**:H506–H513.
38. Miyamae M, Camacho SA, Weiner MW, Figueroa VM. Attenuation of postischemic reperfusion injury is related to prevention of [Ca<sup>2+</sup>]<sub>i</sub> overload in rat hearts. *Am J Physiol* 1996;**271**:H2145–H2153.
39. Marban E, Kitakaze M, Kusuoka H, Porterfield JK, Yue DT, Chacko VP. Intracellular free calcium concentration measured with <sup>19</sup>F NMR spectroscopy in intact ferret hearts. *Proc Natl Acad Sci USA* 1987;**84**:6005–6009.
40. Nichols CG, Lederer WJ. The role of ATP in energy-deprivation contractures in unloaded rat ventricular myocytes. *Can J Physiol Pharmacol* 1990;**68**:183–194.
41. Allshire A, Piper HM, Cuthbertson KS, Cobbold PH. Cytosolic free Ca<sup>2+</sup> in single rat heart cells during anoxia and reoxygenation. *Biochem J* 1987;**244**:381–385.
42. Stern MD, Chien AM, Capogrossi MC, Pelto DJ, Lakatta EG. Direct observation of the 'oxygen paradox' in single rat ventricular myocytes. *Circ Res* 1985;**56**:899–903.
43. Dekker LR, Fiolet JW, VanBavel E, Coronel R, Opthof T, Spaan JA *et al*. Intracellular Ca<sup>2+</sup>, intercellular electrical coupling, and mechanical activity in ischemic rabbit papillary muscle. Effects of preconditioning and metabolic blockade. *Circ Res* 1996;**79**:237–246.
44. Ohtsuka M, Takano H, Suzuki M, Zou Y, Akazawa H, Tamagawa M *et al*. Role of Na<sup>+</sup>-Ca<sup>2+</sup> exchanger in myocardial ischemia/reperfusion injury: evaluation using a heterozygous Na<sup>+</sup>-Ca<sup>2+</sup> exchanger knockout mouse model. *Biochem Biophys Res Commun* 2004;**314**:849–853.
45. Tani M, Neely JR. Role of intracellular Na<sup>+</sup> in Ca<sup>2+</sup> overload and depressed recovery of ventricular function of reperfused ischemic rat hearts. Possible involvement of H<sup>+</sup>-Na<sup>+</sup> and Na<sup>+</sup>-Ca<sup>2+</sup> exchange. *Circ Res* 1989;**65**:1045–1056.
46. Imahashi K, Pott C, Goldhaber JJ, Steenbergen C, Philipson KD, Murphy E. Cardiac-specific ablation of the Na<sup>+</sup>-Ca<sup>2+</sup> exchanger confers protection against ischemia/reperfusion injury. *Circ Res* 2005;**97**:916–921.
47. Maddaford TG, Dibrov E, Hurtado C, Pierce GN. Reduced expression of the Na<sup>+</sup>/Ca<sup>2+</sup> exchanger in adult cardiomyocytes via adenovirally delivered shRNA results in resistance to simulated ischemic injury. *Am J Physiol Heart Circ Physiol* 2010;**298**:H360–H366.
48. Blaustein MP, Lederer WJ. Sodium/calcium exchange: its physiological implications. *Physiol Rev* 1999;**79**:763–854.
49. Grantham CJ, Cannell MB. Ca<sup>2+</sup> influx during the cardiac action potential in guinea pig ventricular myocytes. *Circ Res* 1996;**79**:194–200.
50. Sun J, Picht E, Ginsburg KS, Bers DM, Steenbergen C, Murphy E. Hypercontractile female hearts exhibit increased S-nitrosylation of the L-type Ca<sup>2+</sup> channel alpha1 subunit and reduced ischemia/reperfusion injury. *Circ Res* 2006;**98**:403–411.
51. Miyata H, Lakatta EG, Stern MD, Silverman HS. Relation of mitochondrial and cytosolic free calcium to cardiac myocyte recovery after exposure to anoxia. *Circ Res* 1992;**71**:605–613.
52. Maack C, Cortassa S, Aon MA, Ganesan AN, Liu T, O'Rourke B. Elevated cytosolic Na<sup>+</sup> decreases mitochondrial Ca<sup>2+</sup> uptake during excitation-contraction coupling and impairs energetic adaptation in cardiac myocytes. *Circ Res* 2006;**99**:172–182.
53. Ruiz-Meana M, Garcia-Dorado D, Pina P, Inserte J, Agullo L, Soler-Soler J. Cariporide preserves mitochondrial proton gradient and delays ATP depletion in cardiomyocytes during ischemic conditions. *Am J Physiol Heart Circ Physiol* 2003;**285**:H999–H1006.
54. Garlid KD, Paucek P. Mitochondrial potassium transport: the K<sup>+</sup> cycle. *Biochim Biophys Acta* 2003;**1606**:23–41.
55. Ruiz-Meana M, Garcia-Dorado D, Miro-Casas E, Abellan A, Soler-Soler J. Mitochondrial Ca<sup>2+</sup> uptake during simulated ischemia does not affect permeability transition pore opening upon simulated reperfusion. *Cardiovasc Res* 2006;**71**:715–724.
56. Griffiths EJ, Ocampo CJ, Savage JS, Rutter GA, Hansford RG, Stern MD *et al*. Mitochondrial calcium transporting pathways during hypoxia and reoxygenation in single rat cardiomyocytes. *Cardiovasc Res* 1998;**39**:423–433.
57. Peracchia C. Chemical gating of gap junction channels; roles of calcium, pH and calmodulin. *Biochim Biophys Acta* 2004;**1662**:61–80.
58. Rackauskas M, Neverauskas V, Skeberdis VA. Diversity and properties of connexin gap junction channels. *Medicina (Kaunas)* 2010;**46**:1–12.
59. Sanchez JA, Rodriguez-Sinovas A, Fernandez-Sanz C, Ruiz-Meana M, Garcia-Dorado D. Effects of a reduction in the number of gap junction channels or in their conductance on ischemia-reperfusion arrhythmias in isolated mouse hearts. *Am J Physiol Heart Circ Physiol* 2011;**301**:H2442–H2453.
60. Saez JC, Retamal MA, Basilio D, Bukauskas FF, Bennett MV. Connexin-based gap junction hemichannels: gating mechanisms. *Biochim Biophys Acta* 2005;**1711**:215–224.
61. Quist AP, Rhee SK, Lin H, Lal R. Physiological role of gap-junctional hemichannels. Extracellular calcium-dependent isosmotic volume regulation. *J Cell Biol* 2000;**148**:1063–1074.
62. Thimm J, Mechler A, Lin H, Rhee S, Lal R. Calcium-dependent open/closed conformations and interfacial energy maps of reconstituted hemichannels. *J Biol Chem* 2005;**280**:10646–10654.
63. Ponsaerts R, De Vuyst E, Retamal M, D'hondt C, Vermeire D, Wang N *et al*. Intramolecular loop/tail interactions are essential for connexin 43-hemichannel activity. *FASEB J* 2010;**24**:4378–4395.
64. De Vuyst E, Wang N, Decrock E, De Bock M, Vinken M, Van Moorhem M *et al*. Ca<sup>2+</sup> regulation of connexin 43 hemichannels in C6 glioma and glial cells. *Cell Calcium* 2009;**46**:176–187.
65. Shintani-Ishida K, Uemura K, Yoshida K. Hemichannels in cardiomyocytes open transiently during ischemia and contribute to reperfusion injury following brief ischemia. *Am J Physiol Heart Circ Physiol* 2007;**293**:H1714–H1720.
66. Schalper KA, Sanchez HA, Lee SC, Altenberg GA, Nathanson MH, Saez JC. Connexin 43 hemichannels mediate the Ca<sup>2+</sup> influx induced by extracellular alkalization. *Am J Physiol Cell Physiol* 2010;**299**:C1504–C1515.
67. Kang J, Kang N, Lovatt D, Torres A, Zhao Z, Lin J *et al*. Connexin 43 hemichannels are permeable to ATP. *J Neurosci* 2008;**28**:4702–4711.
68. Rodriguez-Sinovas A, Sanchez JA, Fernandez-Sanz C, Ruiz-Meana M, Garcia-Dorado D. Connexin and pannexin as modulators of myocardial injury. *Biochim Biophys Acta* 2011;doi: dx.doi.org/10.1016/j.bbame.2011.07.041.
69. Rodriguez-Sinovas A, Cabestrero A, Lopez D, Torre I, Morente M, Abellan A *et al*. The modulatory effects of connexin 43 on cell death/survival beyond cell coupling. *Prog Biophys Mol Biol* 2007;**94**:219–232.
70. Zatz M, Starling A. Calpains and disease. *N Engl J Med* 2005;**352**:2413–2423.
71. Inserte J, Garcia-Dorado D, Ruiz-Meana M, Agullo L, Pina P, Soler-Soler J. Ischemic preconditioning attenuates calpain-mediated degradation of structural proteins through a protein kinase A-dependent mechanism. *Cardiovasc Res* 2004;**64**:105–114.
72. Khalil PN, Neuhof C, Huss R, Pollhammer M, Khalil MN, Neuhof H *et al*. Calpain inhibition reduces infarct size and improves global hemodynamics and left ventricular contractility in a porcine myocardial ischemia/reperfusion model. *Eur J Pharmacol* 2005;**528**:124–131.
73. Tsuji T, Ohga Y, Yoshikawa Y, Sakata S, Abe T, Tabayashi N *et al*. Rat cardiac contractile dysfunction induced by Ca<sup>2+</sup> overload: possible link to the proteolysis of alpha-fodrin. *Am J Physiol Heart Circ Physiol* 2001;**281**:H1286–H1294.
74. Yoshikawa Y, Hagihara H, Ohga Y, Nakajima-Takenaka C, Murata KY, Taniguchi S *et al*. Calpain inhibitor-1 protects the rat heart from ischemia-reperfusion injury: analysis by mechanical work and energetics. *Am J Physiol Heart Circ Physiol* 2005;**288**:H1690–H1698.

75. Hernando V, Inserte J, Sartorio CL, Parra VM, Poncelas-Nozal M, Garcia-Dorado D. Calpain translocation and activation as pharmacological targets during myocardial ischemia/reperfusion. *J Mol Cell Cardiol* 2010;**49**:271–279.
76. Molinari M, Carafoli E. Calpain: a cytosolic proteinase active at the membranes. *J Membr Biol* 1997;**156**:1–8.
77. Zhao X, Newcomb JK, Posmantur RM, Wang KK, Pike BR, Hayes RL. pH dependency of mu-calpain and m-calpain activity assayed by casein zymography following traumatic brain injury in the rat. *Neurosci Lett* 1998;**247**:53–57.
78. Argaud L, Gateau-Roesch O, Chalabreysse L, Gomez L, Loufouat J, Thivolet-Bejui F et al. Preconditioning delays Ca<sup>2+</sup>-induced mitochondrial permeability transition. *Cardiovasc Res* 2004;**61**:115–122.
79. Duchen MR. Mitochondria and Ca(2+) in cell physiology and pathophysiology. *Cell Calcium* 2000;**28**:339–348.
80. Bianchi K, Rimessi A, Prandini A, Szabadkai G, Rizzuto R. Calcium and mitochondria: mechanisms and functions of a troubled relationship. *Biochim Biophys Acta* 2004;**1742**:119–131.
81. Saotome M, Katoh H, Satoh H, Nagasaka S, Yoshihara S, Terada H et al. Mitochondrial membrane potential modulates regulation of mitochondrial Ca<sup>2+</sup> in rat ventricular myocytes. *Am J Physiol Heart Circ Physiol* 2005;**288**:H1820–H1828.
82. Ruiz-Meana M, Garcia-Dorado D, Hofstaetter B, Piper HM, Soler-Soler J. Propagation of cardiomyocyte hypercontracture by passage of Na(+) through gap junctions. *Circ Res* 1999;**85**:280–287.
83. Vandenberg JL, Metcalfe JC, Grace AA. Mechanisms of pHi recovery after global ischemia in the perfused heart. *Circ Res* 1993;**72**:993–1003.
84. ten Hove M, van Echteld CJ. Limited effects of post-ischemic NHE blockade on [Na<sup>+</sup>]<sub>i</sub> and pHi in rat hearts explain its lack of cardioprotection. *Cardiovasc Res* 2004;**61**:522–529.
85. Schafer C, Ladilov YV, Siegmund B, Piper HM. Importance of bicarbonate transport for protection of cardiomyocytes against reoxygenation injury. *Am J Physiol Heart Circ Physiol* 2000;**278**:H1457–H1463.
86. van Emous JG, Schreur JH, Ruigrok TJ, van Echteld CJ. Both Na<sup>+</sup>-K<sup>+</sup> ATPase and Na<sup>+</sup>-H<sup>+</sup> exchanger are immediately active upon post-ischemic reperfusion in isolated rat hearts. *J Mol Cell Cardiol* 1998;**30**:337–348.
87. Imahashi K, Kusuoka H, Hashimoto K, Yoshioka J, Yamaguchi H, Nishimura T. Intracellular sodium accumulation during ischemia as the substrate for reperfusion injury. *Circ Res* 1999;**84**:1401–1406.
88. Inserte J, Garcia-Dorado D, Hernando V, Soler-Soler J. Calpain-mediated impairment of Na<sup>+</sup>/K<sup>+</sup>-ATPase activity during early reperfusion contributes to cell death after myocardial ischemia. *Circ Res* 2005;**97**:465–473.
89. Avkiran M, Ibuki C, Shimada Y, Haddock PS. Effects of acidic reperfusion on arrhythmias and Na(+)-K(+)-ATPase activity in regionally ischemic rat hearts. *Am J Physiol* 1996;**270**:H957–H964.
90. Haddock PS, Shattock MJ, Hearse DJ. Modulation of cardiac Na(+)-K<sup>+</sup> pump current: role of protein and nonprotein sulfhydryl redox status. *Am J Physiol* 1995;**269**:H1297–H1307.
91. Schafer C, Ladilov Y, Inserte J, Schafer M, Haffner S, Garcia-Dorado D et al. Role of the reverse mode of the Na<sup>+</sup>/Ca<sup>2+</sup> exchanger in reoxygenation-induced cardiomyocyte injury. *Cardiovasc Res* 2001;**51**:241–250.
92. Wei GZ, Zhou JJ, Wang B, Wu F, Bi H, Wang YM et al. Diastolic Ca<sup>2+</sup> overload caused by Na<sup>+</sup>/Ca<sup>2+</sup> exchanger during the first minutes of reperfusion results in continued myocardial stunning. *Eur J Pharmacol* 2007;**572**:1–11.
93. Orchard C, Brette F. t-Tubules and sarcoplasmic reticulum function in cardiac ventricular myocytes. *Cardiovasc Res* 2008;**77**:237–244.
94. Siegmund B, Schlack W, Ladilov YV, Balsler C, Piper HM. Halothane protects cardiomyocytes against reoxygenation-induced hypercontracture. *Circulation* 1997;**96**:4372–4379.
95. Abdallah Y, Gkatzoflia A, Gligorievski D, Kasseckert S, Euler G, Schluter KD et al. Insulin protects cardiomyocytes against reoxygenation-induced hypercontracture by a survival pathway targeting SR Ca<sup>2+</sup> storage. *Cardiovasc Res* 2006;**70**:346–353.
96. Hanninen SL, Ronkainen JJ, Leskinen H, Tavi P. Mitochondrial uncoupling downregulates calsequestrin expression and reduces SR Ca<sup>2+</sup> stores in cardiomyocytes. *Cardiovasc Res* 2010;**88**:75–82.
97. Abdallah Y, Kasseckert SA, Iraqi W, Said M, Shahzad T, Erdogan A et al. Interplay between Ca<sup>2+</sup> cycling and mitochondrial permeability transition pores promotes reperfusion-induced injury of cardiac myocytes. *J Cell Mol Med* 2011;**15**:2478–2485.
98. Ruiz-Meana M, Abellan A, Miro-Casas E, Agullo E, Garcia-Dorado D. Role of sarcoplasmic reticulum in mitochondrial permeability transition and cardiomyocyte death during reperfusion. *Am J Physiol Heart Circ Physiol* 2009;**297**:H1281–H1289.
99. Ladilov Y, Haffner S, Balsler-Schafer C, Maxeiner H, Piper HM. Cardioprotective effects of KB-R7943: a novel inhibitor of the reverse mode of Na<sup>+</sup>/Ca<sup>2+</sup> exchanger. *Am J Physiol* 1999;**276**:H1868–H1876.
100. Abdallah Y, Gkatzoflia A, Pieper H, Zoga E, Walther S, Kasseckert S et al. Mechanism of cGMP-mediated protection in a cellular model of myocardial reperfusion injury. *Cardiovasc Res* 2005;**66**:123–131.
101. Stokke MK, Briston SJ, Jolle GF, Manzoor I, Louch WE, Oyehaug L et al. Ca(2+) wave probability is determined by the balance between SERCA2-dependent Ca(2+) reuptake and threshold SR Ca(2+) content. *Cardiovasc Res* 2011;**90**:503–512.
102. Palmer JW, Tandler B, Hoppel CL. Biochemical properties of subsarcolemmal and interfibrillar mitochondria isolated from rat cardiac muscle. *J Biol Chem* 1977;**252**:8731–8739.
103. Riva A, Tandler B, Loffredo F, Vazquez E, Hoppel C. Structural differences in two biochemically defined populations of cardiac mitochondria. *Am J Physiol Heart Circ Physiol* 2005;**289**:H868–H872.
104. Palmer JW, Tandler B, Hoppel CL. Heterogeneous response of subsarcolemmal heart mitochondria to calcium. *Am J Physiol* 1986;**250**:H741–H748.
105. Piper HM, Abdallah Y, Kasseckert S, Schluter KD. Sarcoplasmic reticulum-mitochondrial interaction in the mechanism of acute reperfusion injury. Viewpoint. *Cardiovasc Res* 2008;**77**:234–236.
106. Ruiz-Meana M, Fernandez-Sanz C, Garcia-Dorado D. The SR-mitochondria interaction: a new player in cardiac pathophysiology. *Cardiovasc Res* 2010;**88**:30–39.
107. De Sousa E, Veksler V, Minajeva A, Kaasik A, Mateo P, Mayoux E et al. Subcellular creatine kinase alterations. Implications in heart failure. *Circ Res* 1999;**85**:68–76.
108. Csordas G, Renken C, Varnai P, Walter L, Weaver D, Buttle KF et al. Structural and functional features and significance of the physical linkage between ER and mitochondria. *J Cell Biol* 2006;**174**:915–921.
109. de Brito OM, Scorrano L. Mitofusin 2 tethers endoplasmic reticulum to mitochondria. *Nature* 2008;**456**:605–610.
110. Garcia-Perez C, Hajnoczky G, Csordas G. Physical coupling supports the local Ca<sup>2+</sup> transfer between sarcoplasmic reticulum subdomains and the mitochondria in heart muscle. *J Biol Chem* 2008;**283**:32771–32780.
111. Ruiz-Meana M, Abellan A, Miro-Casas E, Garcia-Dorado D. Opening of mitochondrial permeability transition pore induces hypercontracture in Ca(2+) overloaded cardiac myocytes. *Basic Res Cardiol* 2007;**102**:542–552.
112. Ruiz-Meana M, Inserte J, Fernandez-Sanz C, Hernando V, Miro-Casas E, Barba I et al. The role of mitochondrial permeability transition in reperfusion-induced cardiomyocyte death depends on the duration of ischemia. *Basic Res Cardiol* 2011;**106**:1259–1268.
113. Philipson KD, Bersohn MM, Nishimoto AY. Effects of pH on Na<sup>+</sup>-Ca<sup>2+</sup> exchange in canine cardiac sarcolemmal vesicles. *Circ Res* 1982;**50**:287–293.
114. Komukai K, Pascarel C, Orchard CH. Compensatory role of CaMKII on ICa and SR function during acidosis in rat ventricular myocytes. *Pflugers Arch* 2001;**442**:353–361.
115. Balnave CD, Vaughan-Jones RD. Effect of intracellular pH on spontaneous Ca<sup>2+</sup> sparks in rat ventricular myocytes. *J Physiol* 2000;**528**:25–37.
116. Mandel F, Kranias EG, Grassi dG, Sumida M, Schwartz A. The effect of pH on the transient-state kinetics of Ca<sup>2+</sup>-Mg<sup>2+</sup>-ATPase of cardiac sarcoplasmic reticulum. A comparison with skeletal sarcoplasmic reticulum. *Circ Res* 1982;**50**:310–317.
117. Panagiotopoulos S, Daly MJ, Nayler WG. Effect of acidosis and alkalosis on post-ischemic Ca gain in isolated rat heart. *Am J Physiol* 1990;**258**:H821–H828.
118. Orchard CH, Kentish JC. Effects of changes of pH on the contractile function of cardiac muscle. *Am J Physiol* 1990;**258**:C967–C981.
119. Halestrap AP, Clarke SJ, Javadov SA. Mitochondrial permeability transition pore opening during myocardial reperfusion—a target for cardioprotection. *Cardiovasc Res* 2004;**61**:372–385.
120. Ruiz-Meana M, Pina P, Garcia-Dorado D, Rodriguez-Sinovas A, Barba I, Miro E et al. Glycine protects cardiomyocytes against lethal reoxygenation injury by inhibiting mitochondrial permeability transition. *J Physiol* 2004;**558**:873–882.
121. Francis D, Stergiopoulos K, Ek-Vitorin JF, Cao FL, Taffet SM, Delmar M. Connexin diversity and gap junction regulation by pHi. *Dev Genet* 1999;**24**:123–136.
122. Inserte J, Ruiz-Meana M, Rodriguez-Sinovas A, Barba I, Garcia-Dorado D. Contribution of delayed intracellular pH recovery to ischemic postconditioning protection. *Antioxid Redox Signal* 2011;**14**:923–939.
123. Garcia-Dorado D, Agullo L, Sartorio CL, Ruiz-Meana M. Myocardial protection against reperfusion injury: the cGMP pathway. *Thromb Haemost* 2009;**101**:635–642.
124. Szlufcik K, Missiaen L, Parys JB, Callewaert G, De Smedt H. Uncoupled IP3 receptor can function as a Ca<sup>2+</sup>-leak channel: cell biological and pathological consequences. *Biol Cell* 2006;**98**:1–14.
125. Cohen MV, Downey JM. Ischemic postconditioning: from receptor to end-effector. *Antioxid Redox Signal* 2011;**14**:821–831.
126. Zhang WH, Fu SB, Lu FH, Wu B, Gong DM, Pan ZW et al. Involvement of calcium-sensing receptor in ischemia/reperfusion-induced apoptosis in rat cardiomyocytes. *Biochem Biophys Res Commun* 2006;**347**:872–881.
127. Sun J, Murphy E. Calcium-sensing receptor: a sensor and mediator of ischemic preconditioning in the heart. *Am J Physiol Heart Circ Physiol* 2010;**299**:H1309–H1317.
128. Jiang T, Danilo P Jr, Steinberg SF. The thrombin receptor elevates intracellular calcium in adult rat ventricular myocytes. *J Mol Cell Cardiol* 1998;**30**:2193–2199.
129. Mirabet M, Garcia-Dorado D, Ruiz-Meana M, Barrabes JA, Soler-Soler J. Thrombin increases cardiomyocyte acute cell death after ischemia and reperfusion. *J Mol Cell Cardiol* 2005;**39**:277–283.
130. Barrabes JA, Garcia-Dorado D, Ruiz-Meana M, Piper HM, Solares J, Gonzalez MA et al. Myocardial segment shrinkage during coronary reperfusion *in situ*. Relation to hypercontracture and myocardial necrosis. *Pflugers Arch* 1996;**431**:519–526.
131. Piper HM, Garcia-Dorado D, Ovize M. A fresh look at reperfusion injury. *Cardiovasc Res* 1998;**38**:291–300.

132. Vander Heide RS, Angelo JP, Altschuld RA, Ganote CE. Energy dependence of contraction band formation in perfused hearts and isolated adult myocytes. *Am J Pathol* 1986;**125**:55–68.
133. Agullo L, Garcia-Dorado D, Escalona N, Inserte J, Ruiz-Meana M, Barrabes JA et al. Hypoxia and acidosis impair cGMP synthesis in microvascular coronary endothelial cells. *Am J Physiol Heart Circ Physiol* 2002;**283**:H917–H925.
134. Siegmund B, Kletetz T, Schwartz P, Piper HM. Temporary contractile blockade prevents hypercontracture in anoxic-reoxygenated cardiomyocytes. *Am J Physiol* 1991;**260**:H426–H435.
135. Piper HM, Abdallah Y, Schafer C. The first minutes of reperfusion: a window of opportunity for cardioprotection. *Cardiovasc Res* 2004;**61**:365–371.
136. Frank JS, Brady AJ, Farnsworth S, Mottino G. Ultrastructure and function of isolated myocytes after calcium depletion and repletion. *Am J Physiol* 1986;**250**:H265–H275.
137. Piper HM, Spahr R, Hutter JF, Spieckermann PG. The calcium and the oxygen paradox: non-existent on the cellular level. *Basic Res Cardiol* 1985;**80**(Suppl. 2): 159–163.
138. Elz JS, Nayler WG. Ultrastructural damage associated with the Ca<sup>2+</sup> paradox. The protective effect of Mn<sup>2+</sup>. *Am J Pathol* 1984;**117**:131–139.
139. Ray M, Srivastava S, Maitra SC, Dubey MP. The hamster heart is resistant to calcium paradox. *Pharmacol Res* 2000;**41**:475–481.
140. Ladilov Y, Efe O, Schafer C, Rother B, Kasseckert S, Abdallah Y et al. Reoxygenation-induced rigor-type contracture. *J Mol Cell Cardiol* 2003;**35**: 1481–1490.
141. Ventura-Clapier R, Veksler V. Myocardial ischemic contracture. Metabolites affect rigor tension development and stiffness. *Circ Res* 1994;**74**:920–929.
142. Elz JS, Nayler WG. Calcium gain during postischemic reperfusion. The effect of 2,4-dinitrophenol. *Am J Pathol* 1988;**131**:137–145.
143. Chen Q, Camara AK, Stowe DF, Hoppel CL, Lesnefsky EJ. Modulation of electron transport protects cardiac mitochondria and decreases myocardial injury during ischemia and reperfusion. *Am J Physiol Cell Physiol* 2007;**292**:C137–C147.
144. Armstrong SC, Latham CA, Shivell CL, Ganote CE. Ischemic loss of sarcolemmal dystrophin and spectrin: correlation with myocardial injury. *J Mol Cell Cardiol* 2001;**33**:1165–1179.
145. Jordan C, Puschel B, Koob R, Drenckhahn D. Identification of a binding motif for ankyrin on the alpha-subunit of Na<sup>+</sup>,K(+)–ATPase. *J Biol Chem* 1995;**270**: 29971–29975.
146. Rubtsov AM, Lopina OD. Ankyrins. *FEBS Lett* 2000;**482**:1–5.
147. Pedrozo Z, Sanchez G, Torrealba N, Valenzuela R, Fernandez C, Hidalgo C et al. Calpains and proteasomes mediate degradation of ryanodine receptors in a model of cardiac ischemic reperfusion. *Biochim Biophys Acta* 2010;**1802**:356–362.
148. French JP, Quindry JC, Falk DJ, Staib JL, Lee Y, Wang KK et al. Ischemia-reperfusion-induced calpain activation and SERCA2a degradation are attenuated by exercise training and calpain inhibition. *Am J Physiol Heart Circ Physiol* 2006;**290**:H128–H136.
149. Chen M, Won DJ, Krajewski S, Gottlieb RA. Calpain and mitochondria in ischemial reperfusion injury. *J Biol Chem* 2002;**277**:29181–29186.
150. Penzo D, Petronilli V, Angelin A, Cusan C, Colonna R, Scorrano L et al. Arachidonic acid released by phospholipase A(2) activation triggers Ca(2+)-dependent apoptosis through the mitochondrial pathway. *J Biol Chem* 2004;**279**:25219–25225.
151. He L, Lemasters JJ. Regulated and unregulated mitochondrial permeability transition pores: a new paradigm of pore structure and function? *FEBS Lett* 2002;**512**:1–7.
152. Argaud L, Gateau-Roesch O, Muntean D, Chalabreysse L, Loufouat J, Robert D et al. Specific inhibition of the mitochondrial permeability transition prevents lethal reperfusion injury. *J Mol Cell Cardiol* 2005;**38**:367–374.
153. Clarke SJ, McStay GP, Halestrap AP. Sanglifehrin A acts as a potent inhibitor of the mitochondrial permeability transition and reperfusion injury of the heart by binding to cyclophilin-D at a different site from cyclosporin A. *J Biol Chem* 2002;**277**: 34793–34799.
154. Baines CP, Kaiser RA, Purcell NH, Blair NS, Osinska H, Hambleton MA et al. Loss of cyclophilin D reveals a critical role for mitochondrial permeability transition in cell death. *Nature* 2005;**434**:658–662.
155. Zorov DB, Juhaszova M, Yaniv Y, Nuss HB, Wang S, Sollott SJ. Regulation and pharmacology of the mitochondrial permeability transition pore. *Cardiovasc Res* 2009;**83**:213–225.
156. Rizzuto R, Brini M, Murgia M, Pozzan T. Microdomains with high Ca<sup>2+</sup> close to IP<sub>3</sub>-sensitive channels that are sensed by neighboring mitochondria. *Science* 1993;**262**:744–747.
157. Shi Y, Rehman H, Ramshesh VK, Schwartz J, Liu Q, Krishnasamy Y et al. Sphingosine kinase-2 inhibition improves mitochondrial function and survival after hepatic ischemia-reperfusion. *J Hepatol* 2012;**56**:137–145.
158. Zhu WZ, Wang SQ, Chakir K, Yang D, Zhang T, Brown JH et al. Linkage of beta1-adrenergic stimulation to apoptotic heart cell death through protein kinase A-independent activation of Ca<sup>2+</sup>/calmodulin kinase II. *J Clin Invest* 2003;**111**:617–625.
159. Ferrera R, Benhabbouche S, Bopassa JC, Li B, Ovize M. One hour reperfusion is enough to assess function and infarct size with TTC staining in Langendorff rat model. *Cardiovasc Drugs Ther* 2009;**23**:327–331.
160. Schwarz ER, Somoano Y, Hale SL, Kloner RA. What is the required reperfusion period for assessment of myocardial infarct size using triphenyltetrazolium chloride staining in the rat? *J Thromb Thrombolysis* 2000;**10**:181–187.
161. Sanchis D, Llovera M, Ballester M, Comella JX. An alternative view of apoptosis in heart development and disease. *Cardiovasc Res* 2008;**77**:448–451.
162. Inserte J, Barrabes JA, Hernando V, Garcia-Dorado D. Orphan targets for reperfusion injury. *Cardiovasc Res* 2009;**83**:169–178.
163. Vittone L, Mundina-Weilenmann C, Mattiazzi A. Phospholamban phosphorylation by CaMKII under pathophysiological conditions. *Front Biosci* 2008;**13**:5988–6005.
164. Shintani-Ishida K, Yoshida K. Ischemia induces phospholamban dephosphorylation via activation of calcineurin, PKC-alpha, and protein phosphatase 1, thereby inducing calcium overload in reperfusion. *Biochim Biophys Acta* 2011;**1812**:743–751.
165. Qian J, Vafiadaki E, Florea SM, Singh VP, Song W, Lam CK et al. Small heat shock protein 20 interacts with protein phosphatase-1 and enhances sarcoplasmic reticulum calcium cycling. *Circ Res* 2011;**108**:1429–1438.
166. Gorbe A, Giricz Z, Szunyog A, Csont T, Burley DS, Baxter GF et al. Role of cGMP-PKG signaling in the protection of neonatal rat cardiac myocytes subjected to simulated ischemia/reoxygenation. *Basic Res Cardiol* 2010;**105**:643–650.
167. Sun Y, Deng T, Lu N, Yan M, Zheng X. B-type natriuretic peptide protect cardiomyocytes at reperfusion via mitochondrial calcium uniporter. *Biomed Pharmacother* 2010;**64**:170–176.
168. Vila-Petroff M, Salas MA, Said M, Valverde CA, Sapia L, Portiansky E et al. CaMKII inhibition protects against necrosis and apoptosis in irreversible ischemia-reperfusion injury. *Cardiovasc Res* 2007;**73**:689–698.
169. Dong S, Teng Z, Lu FH, Zhao YJ, Li H, Ren H et al. Post-conditioning protects cardiomyocytes from apoptosis via PKC(epsilon)-interacting with calcium-sensing receptors to inhibit endo(sarco)plasmic reticulum-mitochondria crosstalk. *Mol Cell Biochem* 2010;**341**:195–206.
170. Santo-Domingo J, Vay L, Hernandez-Sanmiguel E, Lobaton CD, Moreno A, Montero M et al. The plasma membrane Na<sup>+</sup>/Ca<sup>2+</sup> exchange inhibitor KB-R7943 is also a potent inhibitor of the mitochondrial Ca<sup>2+</sup> uniporter. *Br J Pharmacol* 2007;**151**:647–654.
171. Tani M, Hasegawa H, Suganuma Y, Shinmura K, Kayashi Y, Nakamura Y. Protection of ischemic myocardium by inhibition of contracture in isolated rat heart. *Am J Physiol* 1996;**271**:H2515–H2519.
172. Dou Y, Arlock P, Arner A. Blebbistatin specifically inhibits actin-myosin interaction in mouse cardiac muscle. *Am J Physiol Cell Physiol* 2007;**293**:C1148–C1153.
173. Padilla F, Garcia-Dorado D, Agullo L, Inserte J, Paniagua A, Mirabet S et al. L-Arginine administration prevents reperfusion-induced cardiomyocyte hypercontracture and reduces infarct size in the pig. *Cardiovasc Res* 2000;**46**:412–420.
174. Padilla F, Garcia-Dorado D, Agullo L, Barrabes JA, Inserte J, Escalona N et al. Intravenous administration of the natriuretic peptide urodilatin at low doses during coronary reperfusion limits infarct size in anesthetized pigs. *Cardiovasc Res* 2001;**51**: 592–600.
175. Shah AM, Spurgeon HA, Sollott SJ, Talo A, Lakatta EG. 8-bromo-cGMP reduces the myofilament response to Ca<sup>2+</sup> in intact cardiac myocytes. *Circ Res* 1994;**74**: 970–978.
176. Inserte J, Garcia-Dorado D, Agullo L, Paniagua A, Soler-Soler J. Urodilatin limits acute reperfusion injury in the isolated rat heart. *Cardiovasc Res* 2000;**45**:351–359.
177. Inserte J, Barba I, Poncelas-Nozal M, Hernando V, Agullo L, Ruiz-Meana M et al. cGMP/PKG pathway mediates myocardial postconditioning protection in rat hearts by delaying normalization of intracellular acidosis during reperfusion. *J Mol Cell Cardiol* 2011;**50**:903–909.
178. Neuhof C, Fabiunck V, Speth M, Moller A, Fritz F, Tillmanns H et al. Reduction of myocardial infarction by postischemic administration of the calpain inhibitor A-705253 in comparison to the Na(+) /H(+) exchange inhibitor Cariporide in isolated perfused rabbit hearts. *Biol Chem* 2008;**389**:1505–1512.
179. Yoshikawa Y, Zhang GX, Obata K, Ohga Y, Matsuyoshi H, Taniguchi S et al. Cardioprotective effects of a novel calpain inhibitor SNJ-1945 for reperfusion injury after cardioplegic cardiac arrest. *Am J Physiol Heart Circ Physiol* 2010;**298**:H643–H651.
180. Li Y, Ma J, Zhu H, Singh M, Hill D, Greer PA et al. Targeted inhibition of calpain reduces myocardial hypertrophy and fibrosis in mouse models of type 1 diabetes. *Diabetes* 2011;**60**:2985–2994.
181. Letavernier E, Perez J, Bellocq A, Mesnard L, de Castro KA, Haymann JP et al. Targeting the calpain/calpastatin system as a new strategy to prevent cardiovascular remodeling in angiotensin II-induced hypertension. *Circ Res* 2008;**102**:720–728.
182. Galvez AS, Diwan A, Odley AM, Hahn HS, Osinska H, Melendez JG et al. Cardiomyocyte degeneration with calpain deficiency reveals a critical role in protein homeostasis. *Circ Res* 2007;**100**:1071–1078.
183. Ovize M, Baxter GF, Di Lisa F, Ferdinandy P, Garcia-Dorado D, Hausenloy DJ et al. Postconditioning and protection from reperfusion injury: where do we stand? Position paper from the Working Group of Cellular Biology of the Heart of the European Society of Cardiology. *Cardiovasc Res* 2010;**87**:406–423.
184. Kim JS, Ohshima S, Peditaditakis P, Lemasters JJ. Nitric oxide: a signaling molecule against mitochondrial permeability transition- and pH-dependent cell death after reperfusion. *Free Radic Biol Med* 2004;**37**:1943–1950.

185. Rickover O, Zinman T, Kaplan D, Shainberg A. Exogenous nitric oxide triggers classic ischemic preconditioning by preventing intracellular  $\text{Ca}^{2+}$  overload in cardiomyocytes. *Cell Calcium* 2008;**43**:324–333.
186. Sheiban I, Tonni S, Chizzoni A, Marini A, Trevi G. Recovery of left ventricular function following early reperfusion in acute myocardial infarction: a potential role for the calcium antagonist nisoldipine. *Cardiovasc Drugs Ther* 1997;**11**:5–16.
187. Theroux P, Gregoire J, Chin C, Pelletier G, de Guise P, Juneau M. Intravenous diltiazem in acute myocardial infarction. Diltiazem as adjunctive therapy to activase (DATA) trial. *J Am Coll Cardiol* 1998;**32**:620–628.
188. Kawasumi H, Satoh N, Kitada Y. Caldaret, an intracellular  $\text{Ca}^{2+}$  handling modulator, limits infarct size of reperfused canine heart. *J Pharmacol Sci* 2007;**103**:222–233.
189. Bar FW, Tzivoni D, Dirksen MT, Fernandez-Ortiz A, Heyndrickx GR, Brachmann J et al. Results of the first clinical study of adjunctive CALdaret (MCC-135) in patients undergoing primary percutaneous coronary intervention for ST-Elevation Myocardial Infarction: the randomized multicentre CASTEMI study. *Eur Heart J* 2006;**27**:2516–2523.
190. Jang IK, Weissman NJ, Picard MH, Zile MR, Pettigrew V, Shen S et al. A randomized, double-blind, placebo-controlled study of the safety and efficacy of intravenous MCC-135 as an adjunct to primary percutaneous coronary intervention in patients with acute myocardial infarction: evaluation of MCC-135 for left ventricular salvage in acute myocardial infarction (EVOLVE). *Am Heart J* 2008;**155**:113–118.
191. Theroux P, Chaitman BR, Danchin N, Erhardt L, Meinertz T, Schroeder JS et al. Inhibition of the sodium-hydrogen exchanger with cariporide to prevent myocardial infarction in high-risk ischemic situations. Main results of the GUARDIAN trial. Guard during ischemia against necrosis (GUARDIAN) Investigators. *Circulation* 2000;**102**:3032–3038.
192. Zeymer U, Suryapranata H, Monassier JP, Opolski G, Davies J, Rasmanis G et al. The  $\text{Na}^{+}/\text{H}^{+}$  exchange inhibitor eniporide as an adjunct to early reperfusion therapy for acute myocardial infarction. Results of the evaluation of the safety and cardioprotective effects of eniporide in acute myocardial infarction (ESCAMI) trial. *J Am Coll Cardiol* 2001;**38**:1644–1650.
193. Mentzer RM Jr, Bartels C, Bolli R, Boyce S, Buckberg GD, Chaitman B et al. Sodium-hydrogen exchange inhibition by cariporide to reduce the risk of ischemic cardiac events in patients undergoing coronary artery bypass grafting: results of the EXPEDITION study. *Ann Thorac Surg* 2008;**85**:1261–1270.
194. Kitakaze M, Asakura M, Kim J, Shintani Y, Asanuma H, Hamasaki T et al. Human atrial natriuretic peptide and nicorandil as adjuncts to reperfusion treatment for acute myocardial infarction (J-WIND): two randomised trials. *Lancet* 2007;**370**:1483–1493.
195. Amit G, Cafri C, Yaroslavtsev S, Fuchs S, Paltiel O, Abu-Ful A et al. Intracoronary nitroprusside for the prevention of the no-reflow phenomenon after primary percutaneous coronary intervention in acute myocardial infarction. A randomized, double-blind, placebo-controlled clinical trial. *Am Heart J* 2006;**152**:887.e9–887.e14.
196. ISIS-4: a randomised factorial trial assessing early oral captopril, oral mononitrate, and intravenous magnesium sulphate in 58,050 patients with suspected acute myocardial infarction. ISIS-4 (Fourth International Study of Infarct Survival) Collaborative Group. *Lancet* 1995;**345**:669–685.
197. Piot C, Croisille P, Staat P, Thibault H, Rioufol G, Mewton N et al. Effect of cyclosporine on reperfusion injury in acute myocardial infarction. *N Engl J Med* 2008;**359**:473–481.
198. McCully JD, Toyoda Y, Wakiyama H, Rousou AJ, Parker RA, Levitsky S. Age- and gender-related differences in ischemia/reperfusion injury and cardioprotection: effects of diazoxide. *Ann Thorac Surg* 2006;**82**:117–123.
199. Ataka K, Chen D, Levitsky S, Jimenez E, Feinberg H. Effect of aging on intracellular  $\text{Ca}^{2+}$ , pHi, and contractility during ischemia and reperfusion. *Circulation* 1992;**86**:II371–II376.
200. Fowler MR, Naz JR, Graham MD, Orchard CH, Harrison SM. Age and hypertrophy alter the contribution of sarcoplasmic reticulum and  $\text{Na}^{+}/\text{Ca}^{2+}$  exchange to  $\text{Ca}^{2+}$  removal in rat left ventricular myocytes. *J Mol Cell Cardiol* 2007;**42**:582–589.
201. Rhodes SS, Camara AK, Heisner JS, Riess ML, Aldakkak M, Stowe DF. Reduced mitochondrial  $\text{Ca}^{2+}$  loading and improved functional recovery after ischemia reperfusion injury in old vs. young guinea pig hearts. *Am J Physiol Heart Circ Physiol* 2012;**302**:H856–H863.
202. Curl CL, Delbridge LM, Canny BJ, Wendt IR. Testosterone modulates cardiomyocyte  $\text{Ca}^{2+}$  handling and contractile function. *Physiol Res* 2009;**58**:293–297.
203. Kravtsov GM, Kam KW, Liu J, Wu S, Wong TM. Altered  $\text{Ca}^{2+}$  handling by ryanodine receptor and  $\text{Na}^{+}/\text{Ca}^{2+}$  exchange in the heart from ovariectomized rats: role of protein kinase A. *Am J Physiol Cell Physiol* 2007;**292**:C1625–C1635.
204. Wang M, Wang Y, Weil B, Arbanell A, Herrmann J, Tan J et al. Estrogen receptor beta mediates increased activation of PI3K/Akt signaling and improved myocardial function in female hearts following acute ischemia. *Am J Physiol Regul Integr Comp Physiol* 2009;**296**:R972–R978.
205. Xu Y, Arenas IA, Armstrong SJ, Plahta WC, Xu H, Davidge ST. Estrogen improves cardiac recovery after ischemia/reperfusion by decreasing tumor necrosis factor- $\alpha$ . *Cardiovasc Res* 2006;**69**:836–844.
206. Frasier CR, Moore RL, Brown DA. Exercise-induced cardiac preconditioning: how exercise protects your achy-breaky heart. *J Appl Physiol* 2011;**111**:905–915.
207. Kemi OJ, MacQuaide N, Hoydal MA, Ellingsen O, Smith GL, Wisloff U. Exercise training corrects control of spontaneous calcium waves in hearts from myocardial infarction heart failure rats. *J Cell Physiol* 2012;**227**:20–26.
208. Farah C, Meyer G, Andre L, Boissiere J, Gayraud S, Cazorla O et al. Moderate exercise prevents impaired  $\text{Ca}^{2+}$  handling in heart of CO-exposed rat: implication for sensitivity to ischemia-reperfusion. *Am J Physiol Heart Circ Physiol* 2010;**299**:H2076–H2081.
